# Supplementary material for: α-Chymotrypsin andl-acylase aided synthesis of 5-hydroxypipecolic acid via Jacobsen's hydrolytic kinetic resolution of epoxy amino acids
Source: Royal Society of Chemistry journal article supplement (doi:10.1039/c5ra09207h), 2015-01-01

**$\alpha$ -Chymotrypsin and L-acylase aided synthesis of 5-hydroxy pipercolic acid via  
Jacobsen's hydrolytic kinetic resolution of epoxy amino acids.**

**Suvratha Krishnamurthy,<sup>†\*</sup> Jalli Venkataprasad,<sup>†</sup> Tarun Chand Vagvala,<sup>‡</sup>**

**Tetsuji Moriguchi,<sup>†</sup> and Akihiko Tsuge.<sup>†</sup>**

<sup>†</sup>Department of Applied Chemistry, Kyushu Institute of Technology, Kitakyushu 804-8550,  
Japan

<sup>‡</sup>Graduate School of Life Science and Systems Engineering, Kyushu Institute of Technology,  
Kitakyushu 808-0196, Japan

e-mail : suvrathak@gmail.com

|                                                                                                         |         |
|---------------------------------------------------------------------------------------------------------|---------|
| Synthesis of (2 <i>R</i> ,5 <i>R</i> ) and (2 <i>R</i> ,5 <i>S</i> )-5-hydroxy pipercolic acid          | S2      |
| <sup>1</sup> H NMR and <sup>13</sup> C NMR of ( <i>RS</i> )- <b>6</b> in CD <sub>3</sub> OD             | S3-S4   |
| <sup>1</sup> H NMR and <sup>13</sup> C NMR of ( <i>S</i> )- <b>7</b> in D <sub>2</sub> O                | S5-S6   |
| <sup>1</sup> H NMR and <sup>13</sup> C NMR of ( <i>RS</i> )- <b>9</b> in CDCl <sub>3</sub>              | S7-S8   |
| <sup>1</sup> H NMR and <sup>13</sup> C NMR of ( <i>S</i> )- <b>10</b> in CD <sub>3</sub> OD             | S9-S10  |
| <sup>1</sup> H NMR and <sup>13</sup> C NMR of ( <i>S</i> )- <b>11</b> in CDCl <sub>3</sub>              | S11-S12 |
| <sup>1</sup> H NMR and <sup>13</sup> C NMR of ( <i>S</i> )- <b>12</b> in CDCl <sub>3</sub>              | S13-S14 |
| <sup>1</sup> H NMR and <sup>13</sup> C NMR of ( <i>S</i> )- <b>13</b> in CDCl <sub>3</sub>              | S15-S16 |
| <sup>1</sup> H NMR and <sup>13</sup> C NMR of (2 <i>S</i> ,5 <i>R</i> )- <b>16</b> in CDCl <sub>3</sub> | S17-S18 |
| <sup>1</sup> H NMR and <sup>13</sup> C NMR of ( <i>S</i> )- <b>17</b> in CDCl <sub>3</sub>              | S19-S20 |
| <sup>1</sup> H NMR and <sup>13</sup> C NMR of ( <i>S</i> )- <b>18</b> in CDCl <sub>3</sub>              | S21-S22 |
| <sup>1</sup> H NMR and <sup>13</sup> C NMR of (2 <i>S</i> ,5 <i>S</i> )- <b>19</b> in CDCl <sub>3</sub> | S23-S24 |
| <sup>1</sup> H NMR <b>1.HCl</b> in D <sub>2</sub> O                                                     | S25     |
| <sup>1</sup> H NMR <b>2.HCl</b> in D <sub>2</sub> O                                                     | S26     |

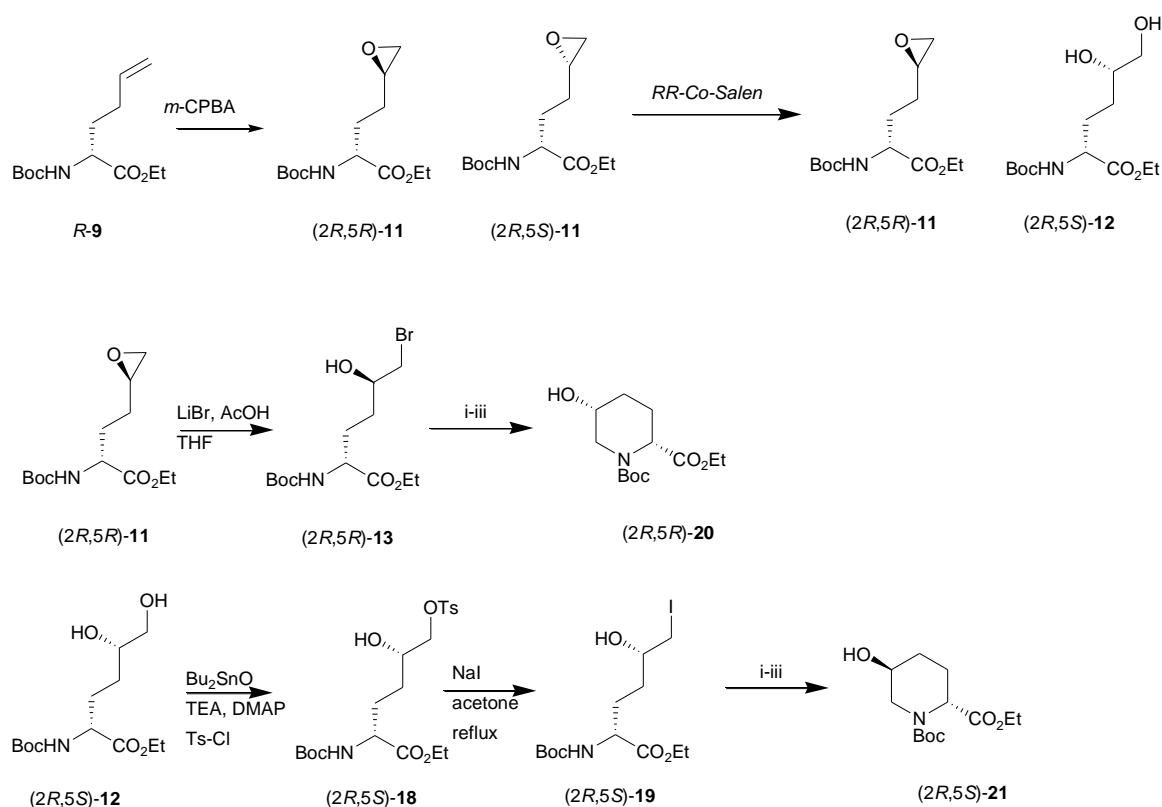

### ***m*-CPBA oxidation of (*R*)-9.<sup>1</sup>**

(*R*)-9 (1.50 g, 5.84 mmol) was dissolved in DCM 30.0 mL and cooled to 0 °C. To this solution *m*-CPBA (2.00 g, 8.75 mmol) was added in one portion, and stirred, the ice-water bath was removed once the *m*-CPBA completely dissolved and allowed to stir at room temperature. After 24 h work up and purification similar to [(2*S*)-12], gave diastereomers of (2*R*)-12 (1.45 g, 91 %) as an oil. (spectral data similar to (2*S*)-isomer).

### **Jacobsen's Hydrolytic Kinetic Resolution (HKR).**

(2*R*)-12 (0.41 g, 1.50 mmol) was taken in a vial equipped with a stir bar, to this was added (*RR*)-Co-Salen (0.5 mol %, 5 mg), followed by acetic acid (12 μL) and THF (0.10 mL). Finally H<sub>2</sub>O (0.83 mmol, 15 μL) was added in one portion at room temperature and stirred. After 48 h, work up and purification similar to [(2*S*) isomer] gave (2*R*,5*R*)-12 (0.190 g, 46 %) and (2*R*,5*S*)-13 (0.194 g, 44 %). (spectral data of both the compounds were similar to their (2*S*)-isomers).

**Synthesis of (2*R*,5*R*)-20 and (2*R*,5*S*)-21.** All the reaction were carried out in a exact manner similar to (2*S*)-isomers to get (2*R*,5*R*)-20 and (2*R*,5*S*)-21, both as oil. (spectral data similar to their enantiomers)

<sup>1</sup> To improve the ee, (*R*)-9 (2.42 g, 9.41 mmol) was again suspended in phosphate buffer (50 mL 0.1 M, pH 8.0) and treated with α-chymotrypsin (2 mg), after 24 h, usual work up gave (*R*)-9 in 95 % yield.

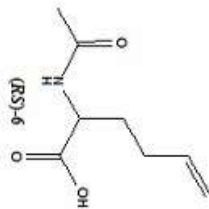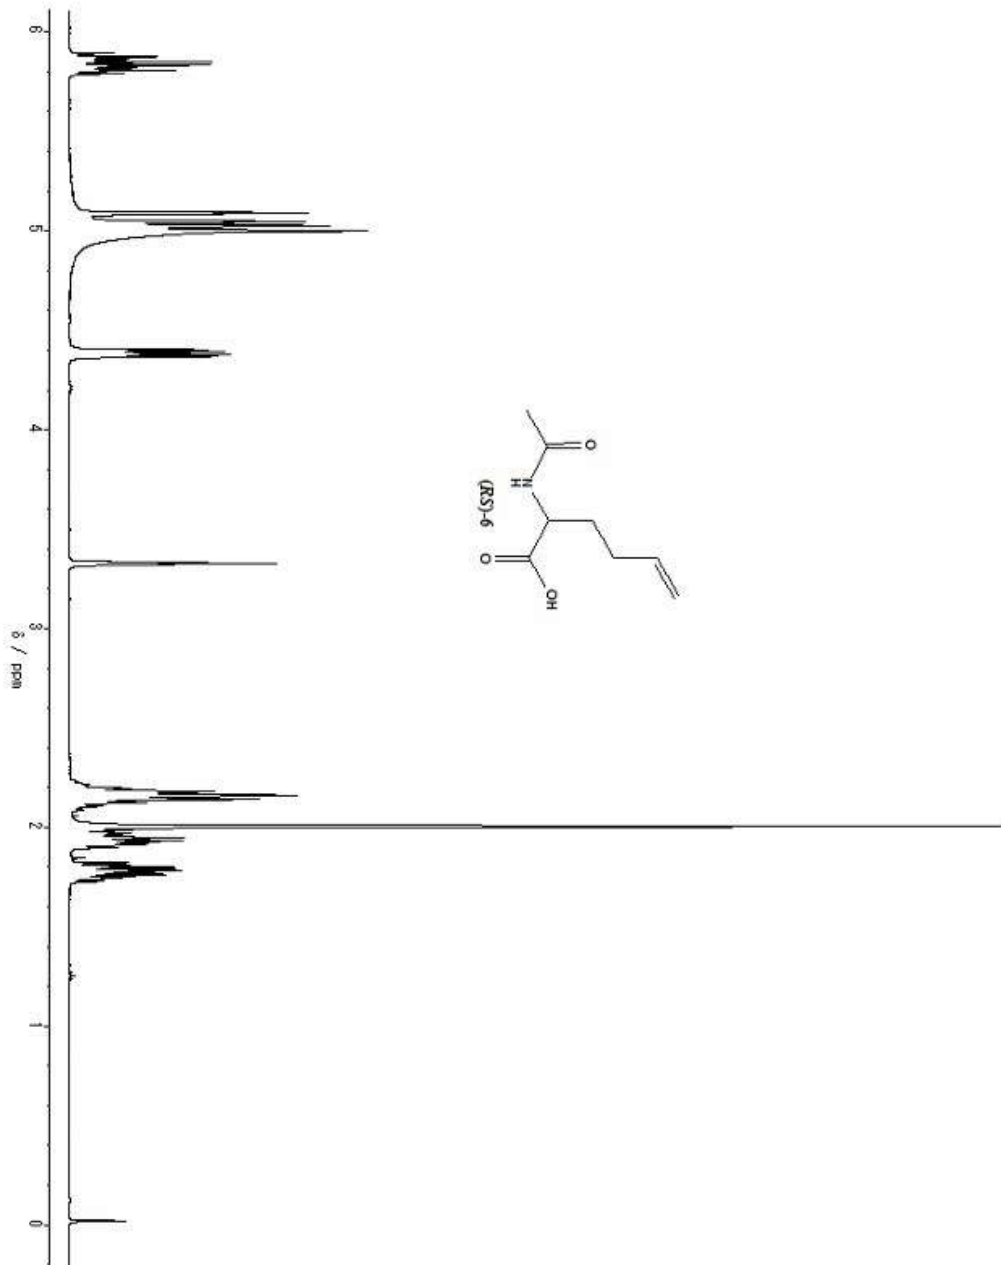

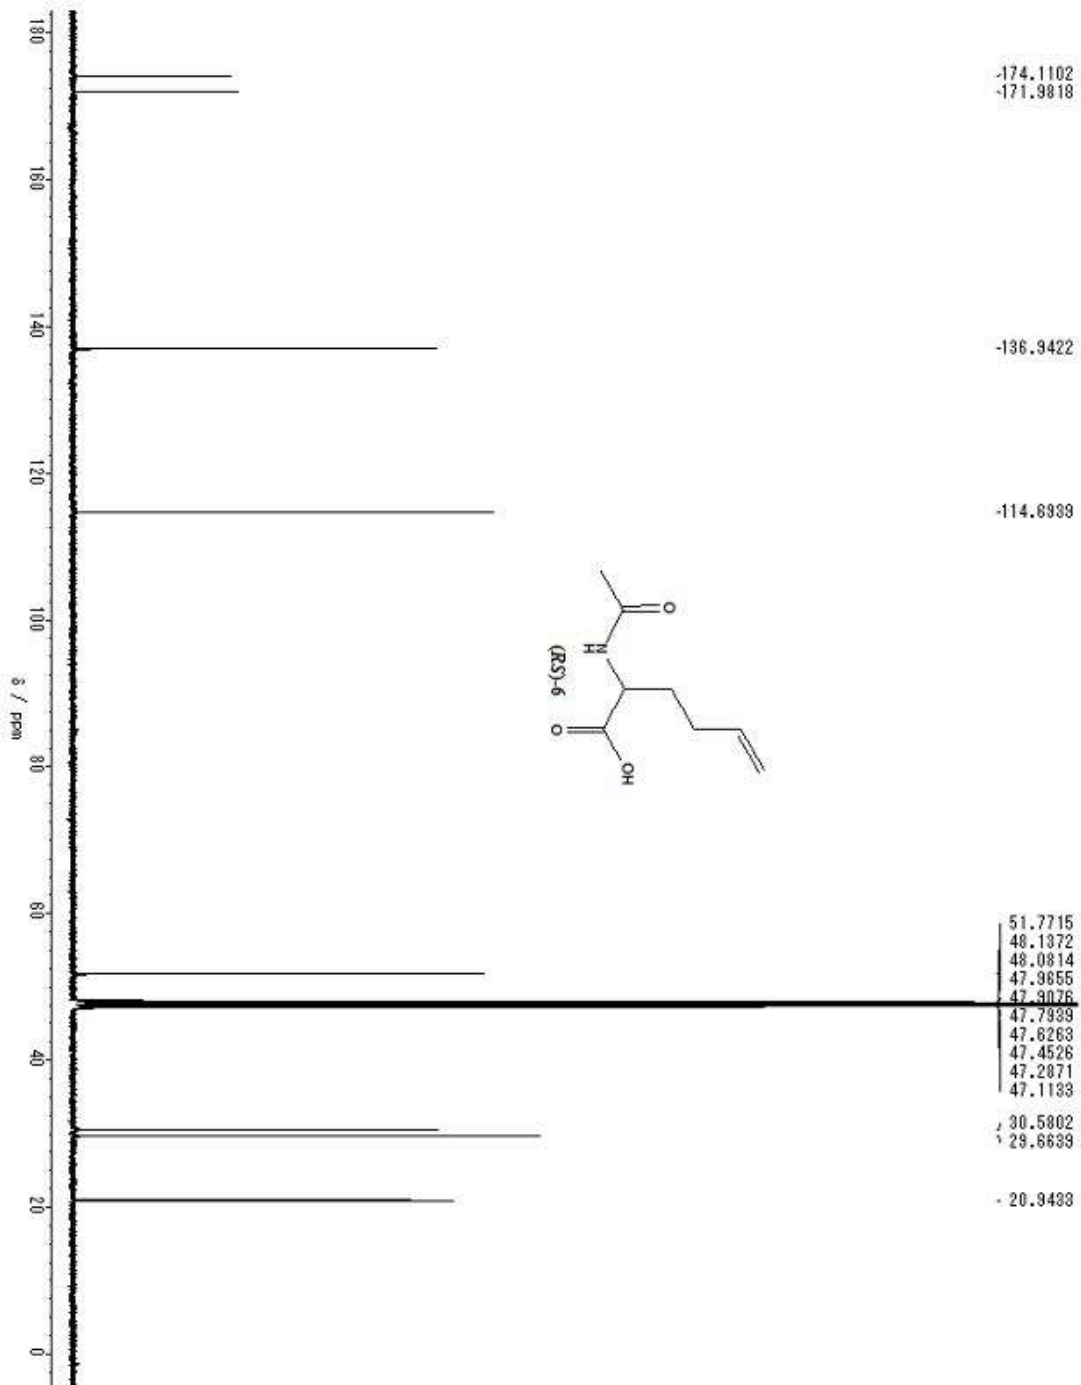

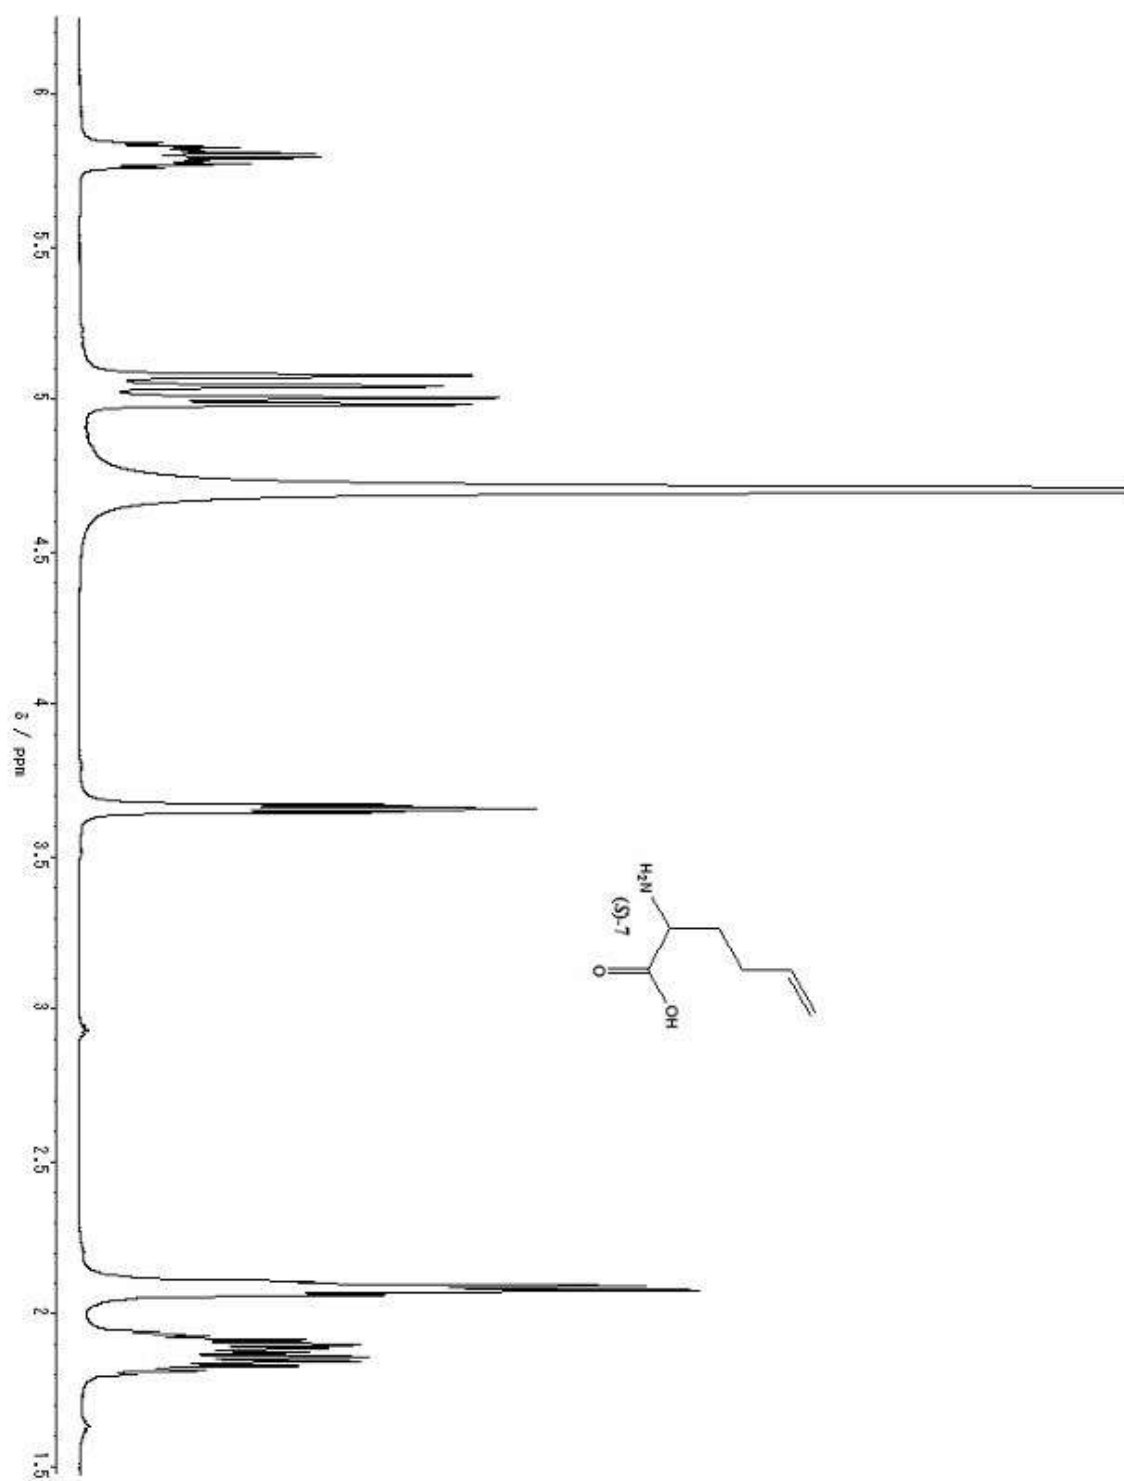

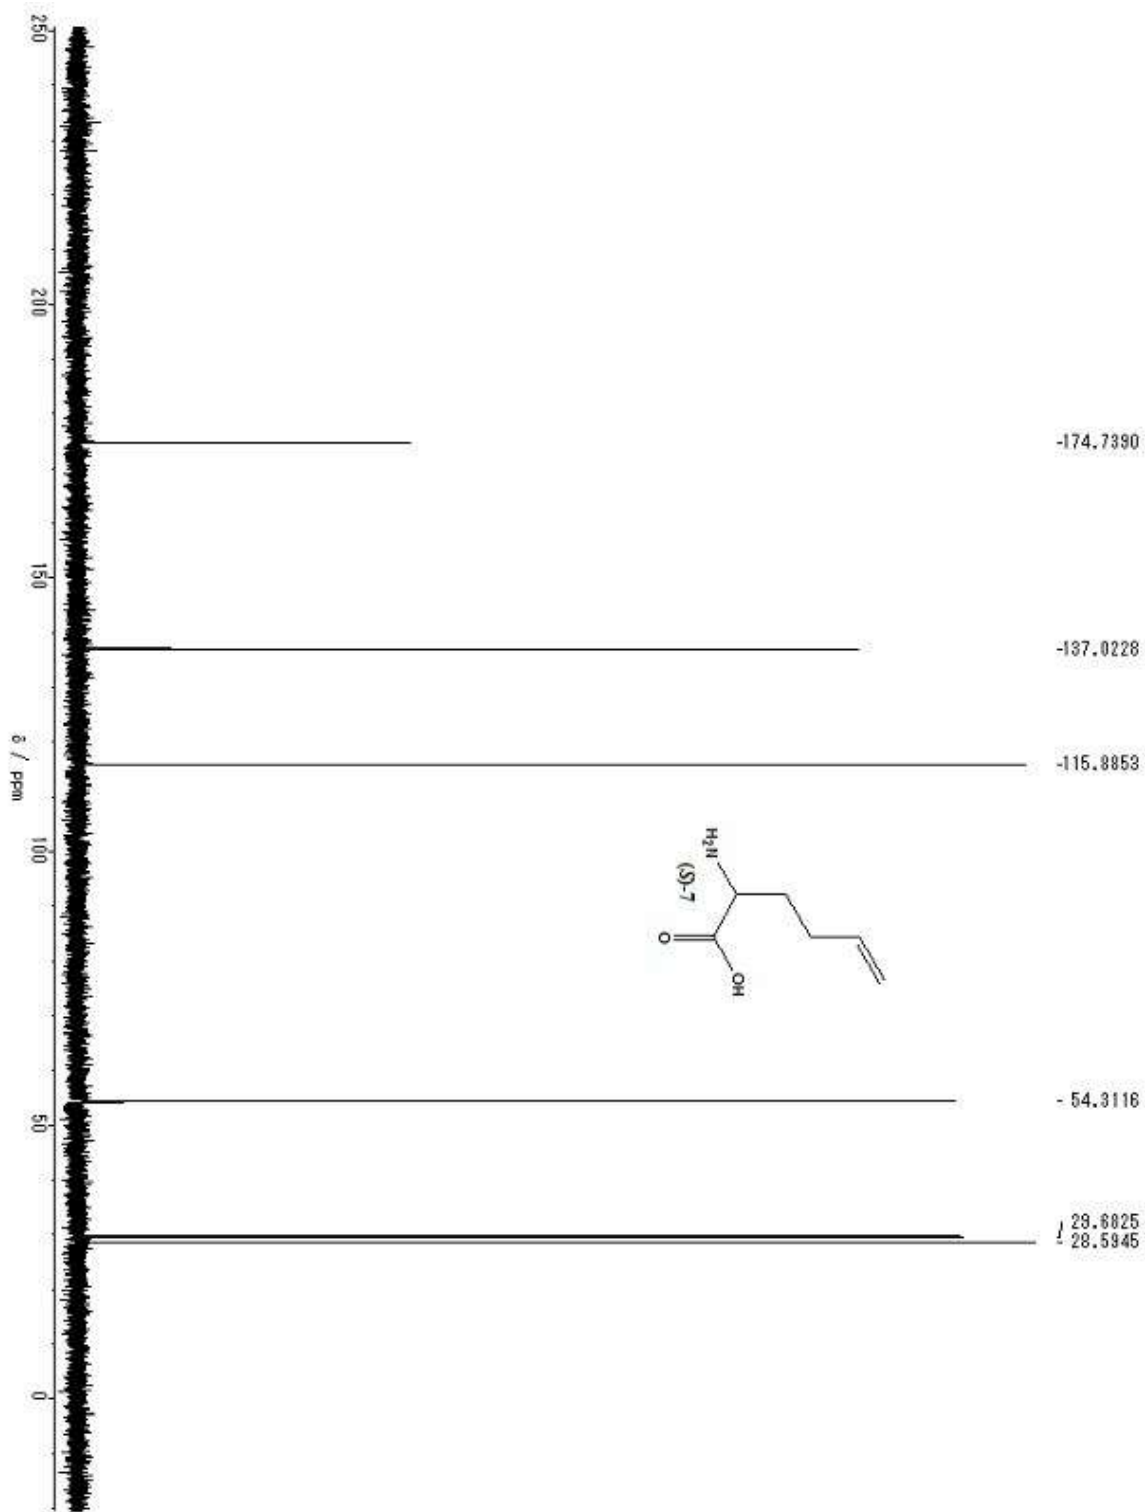

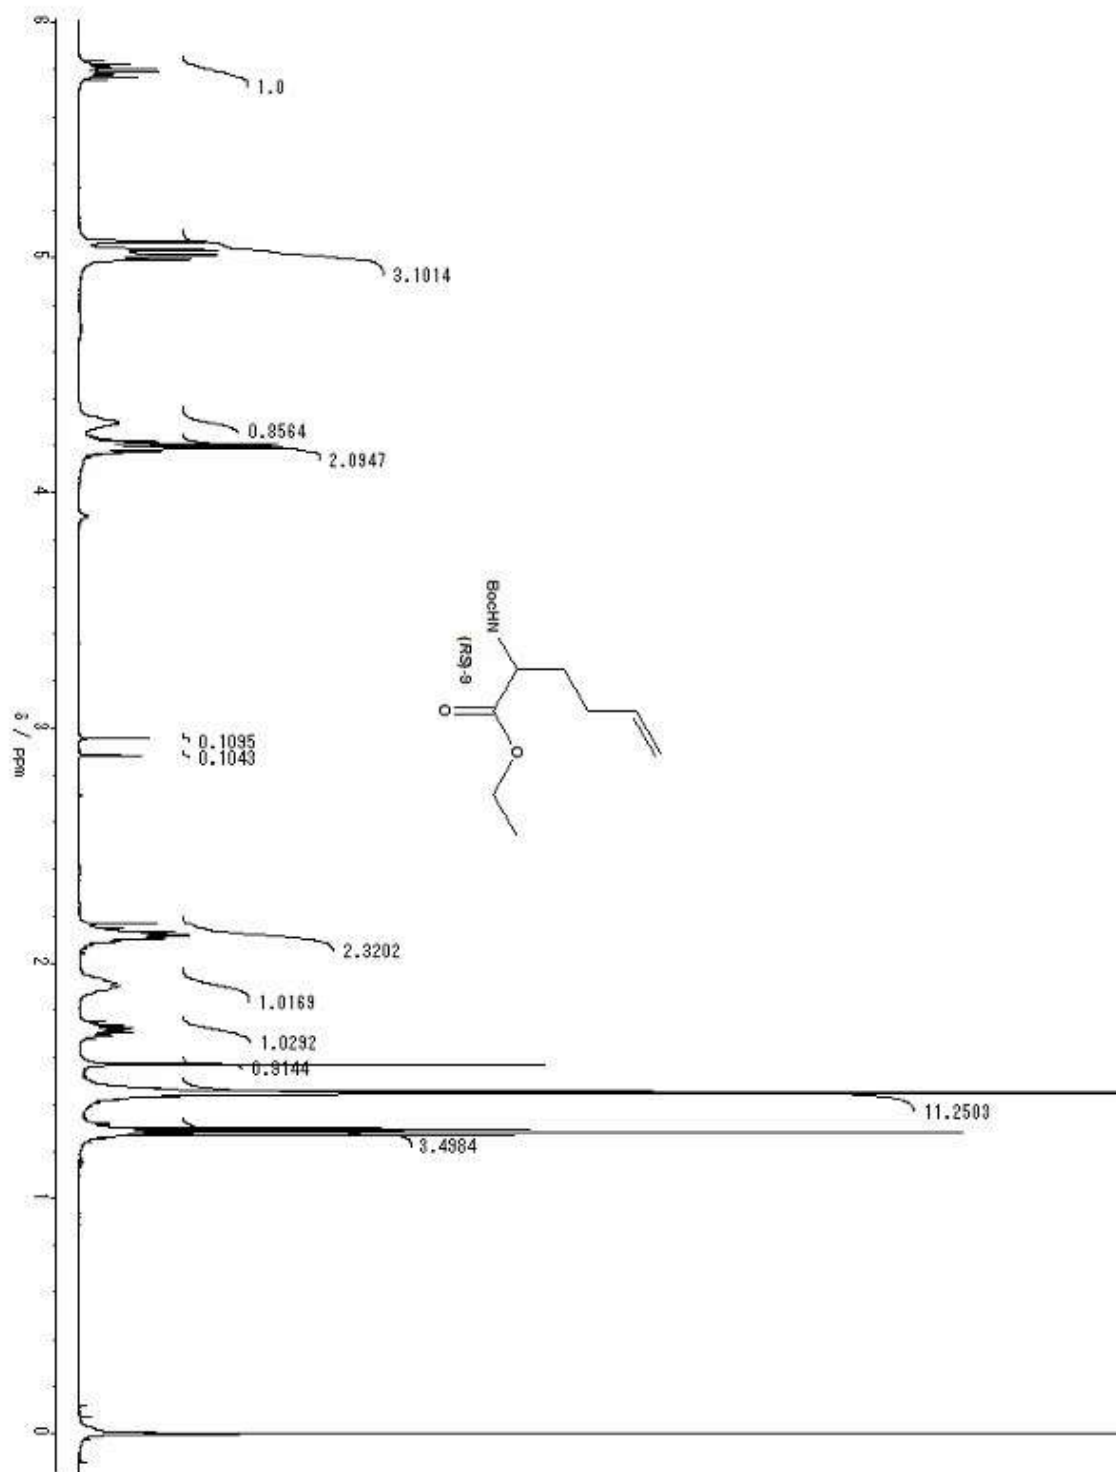

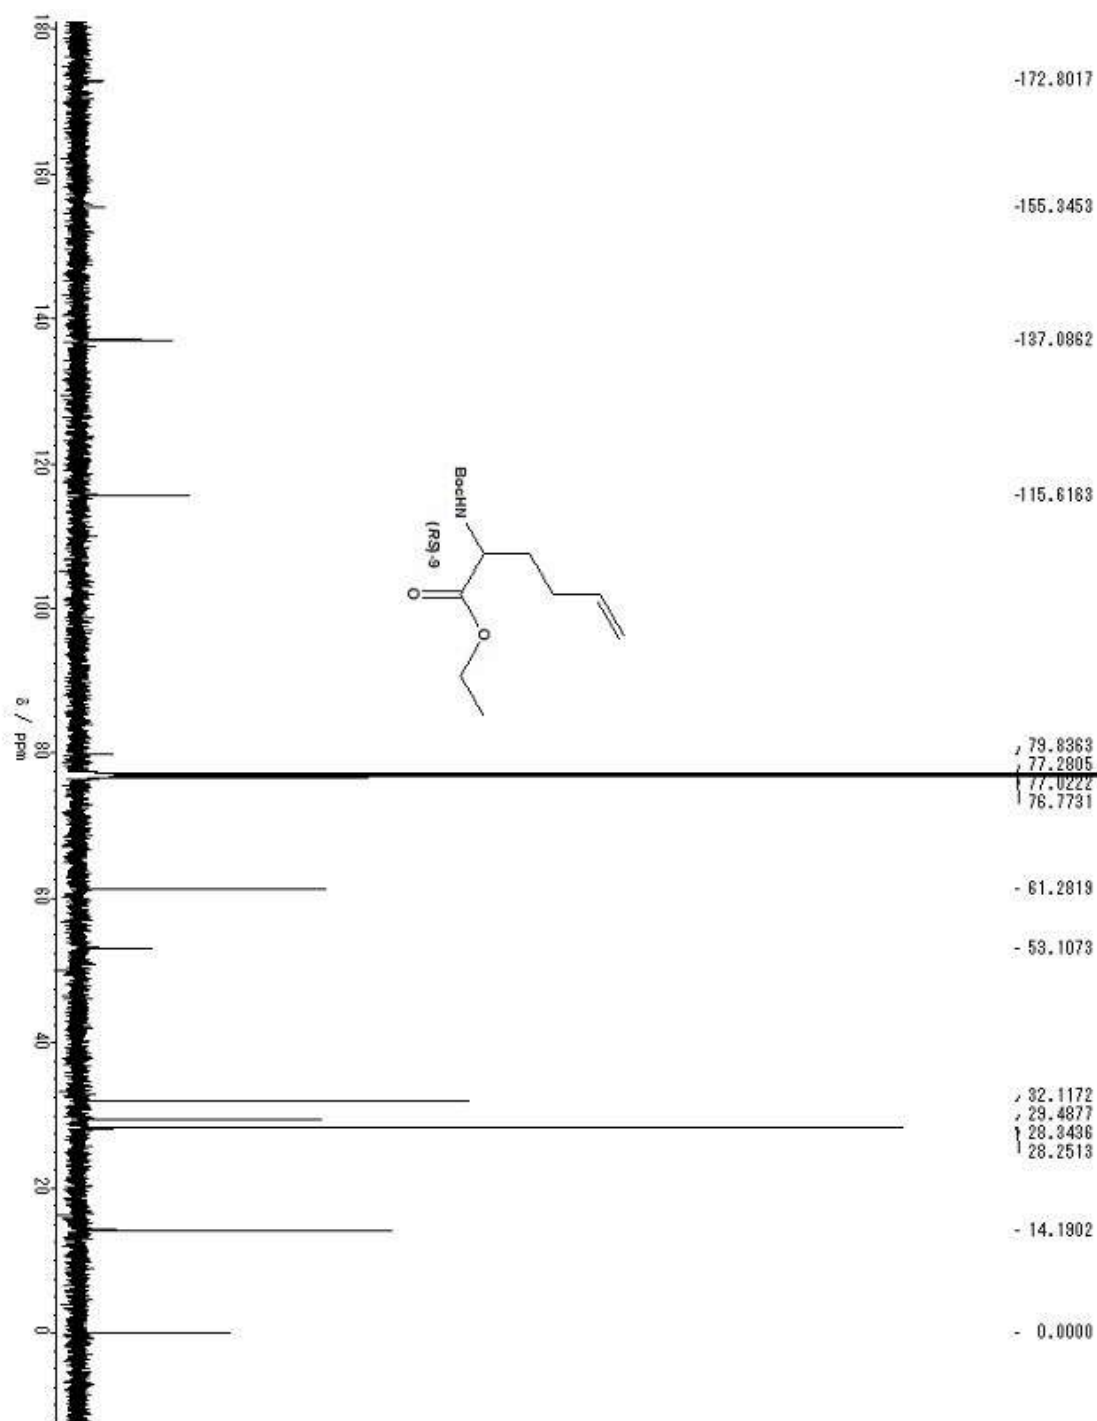



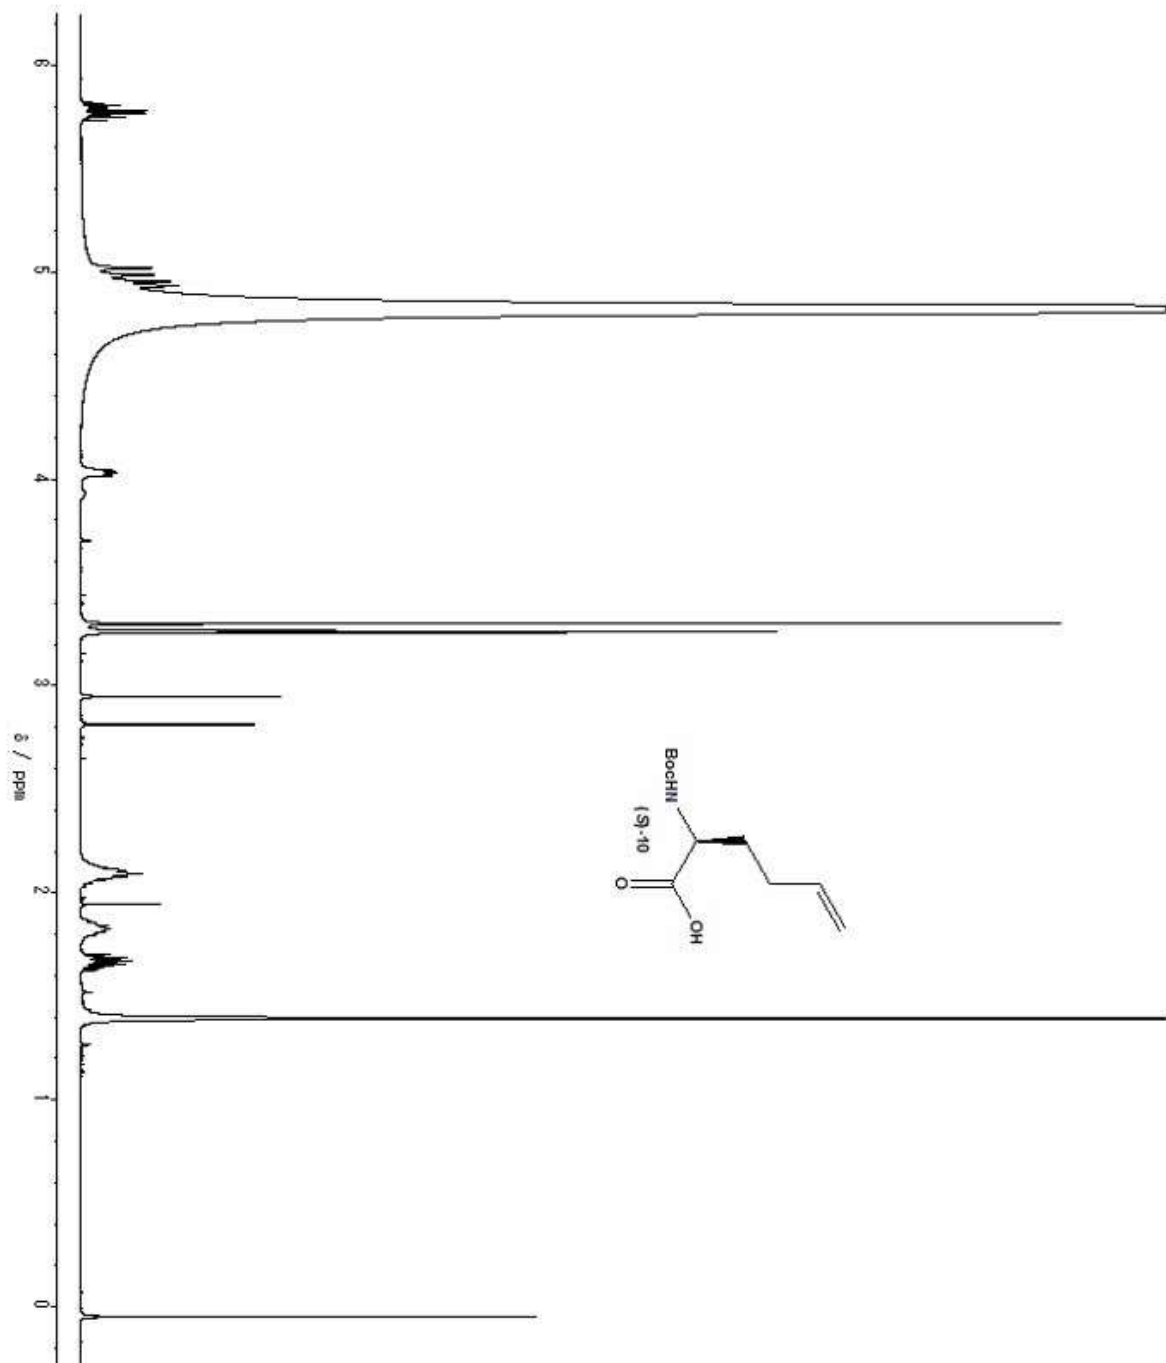

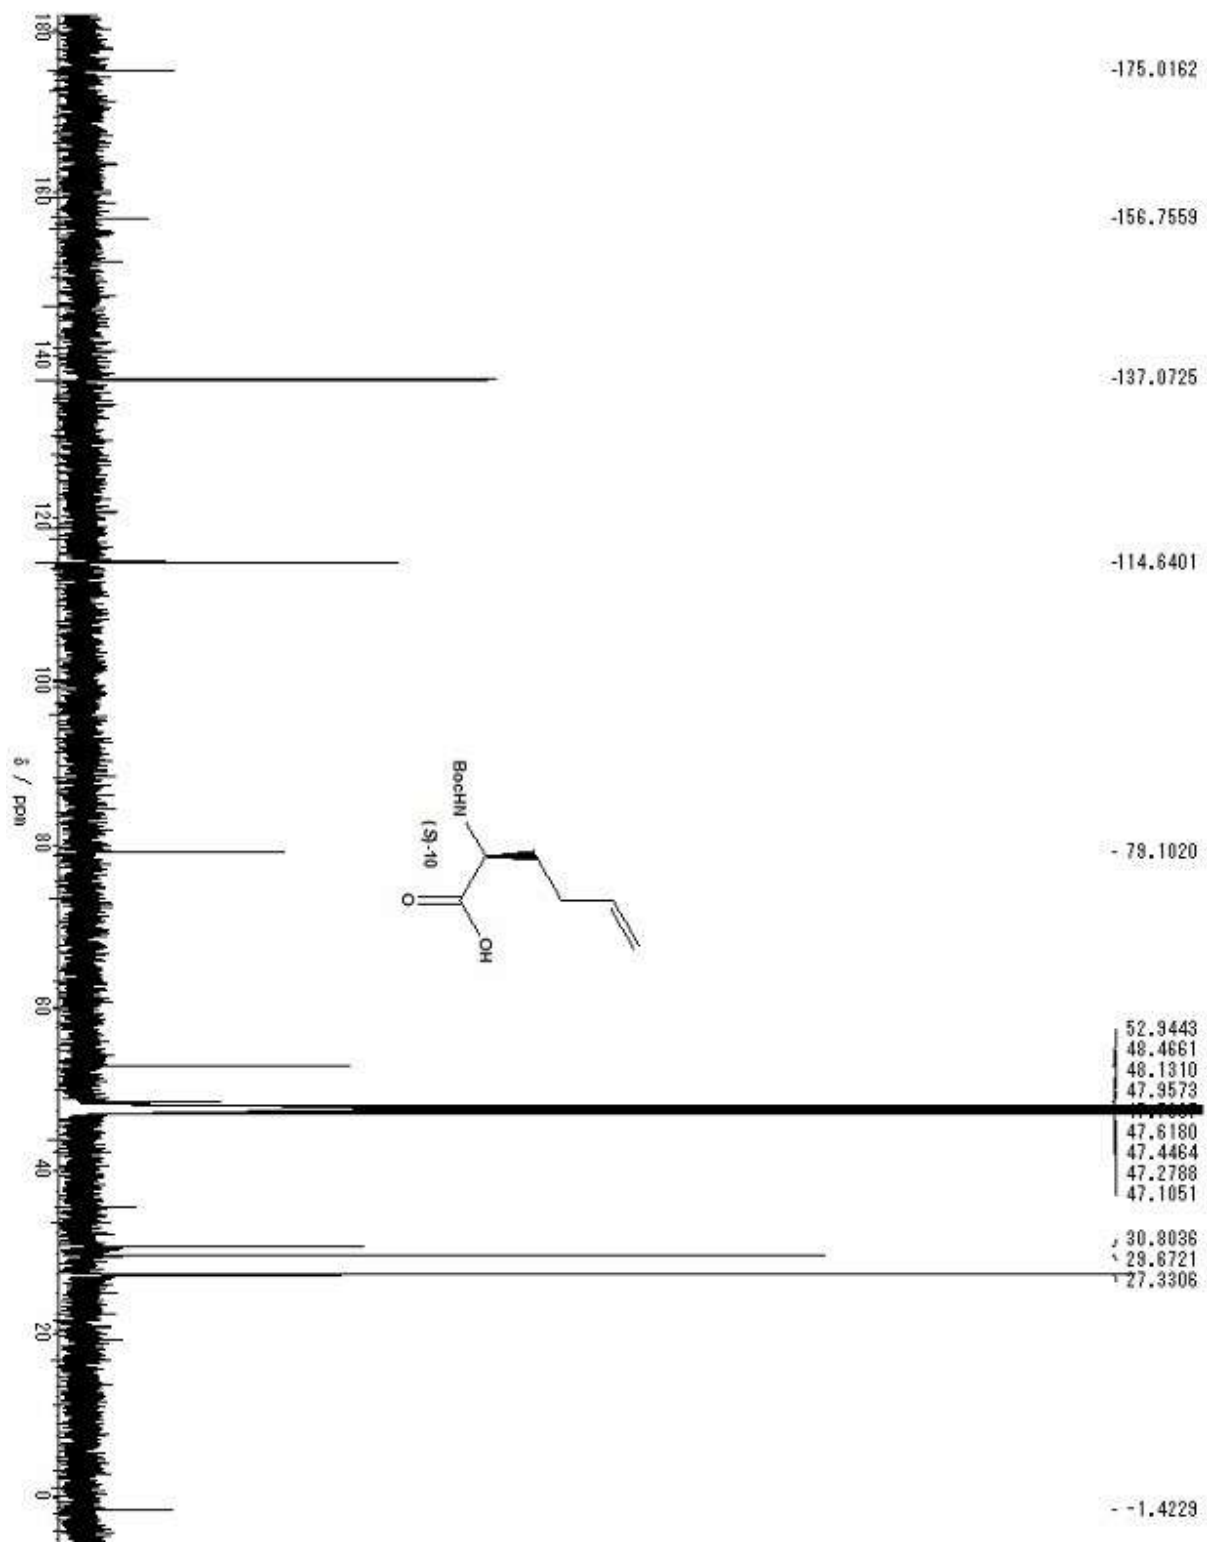

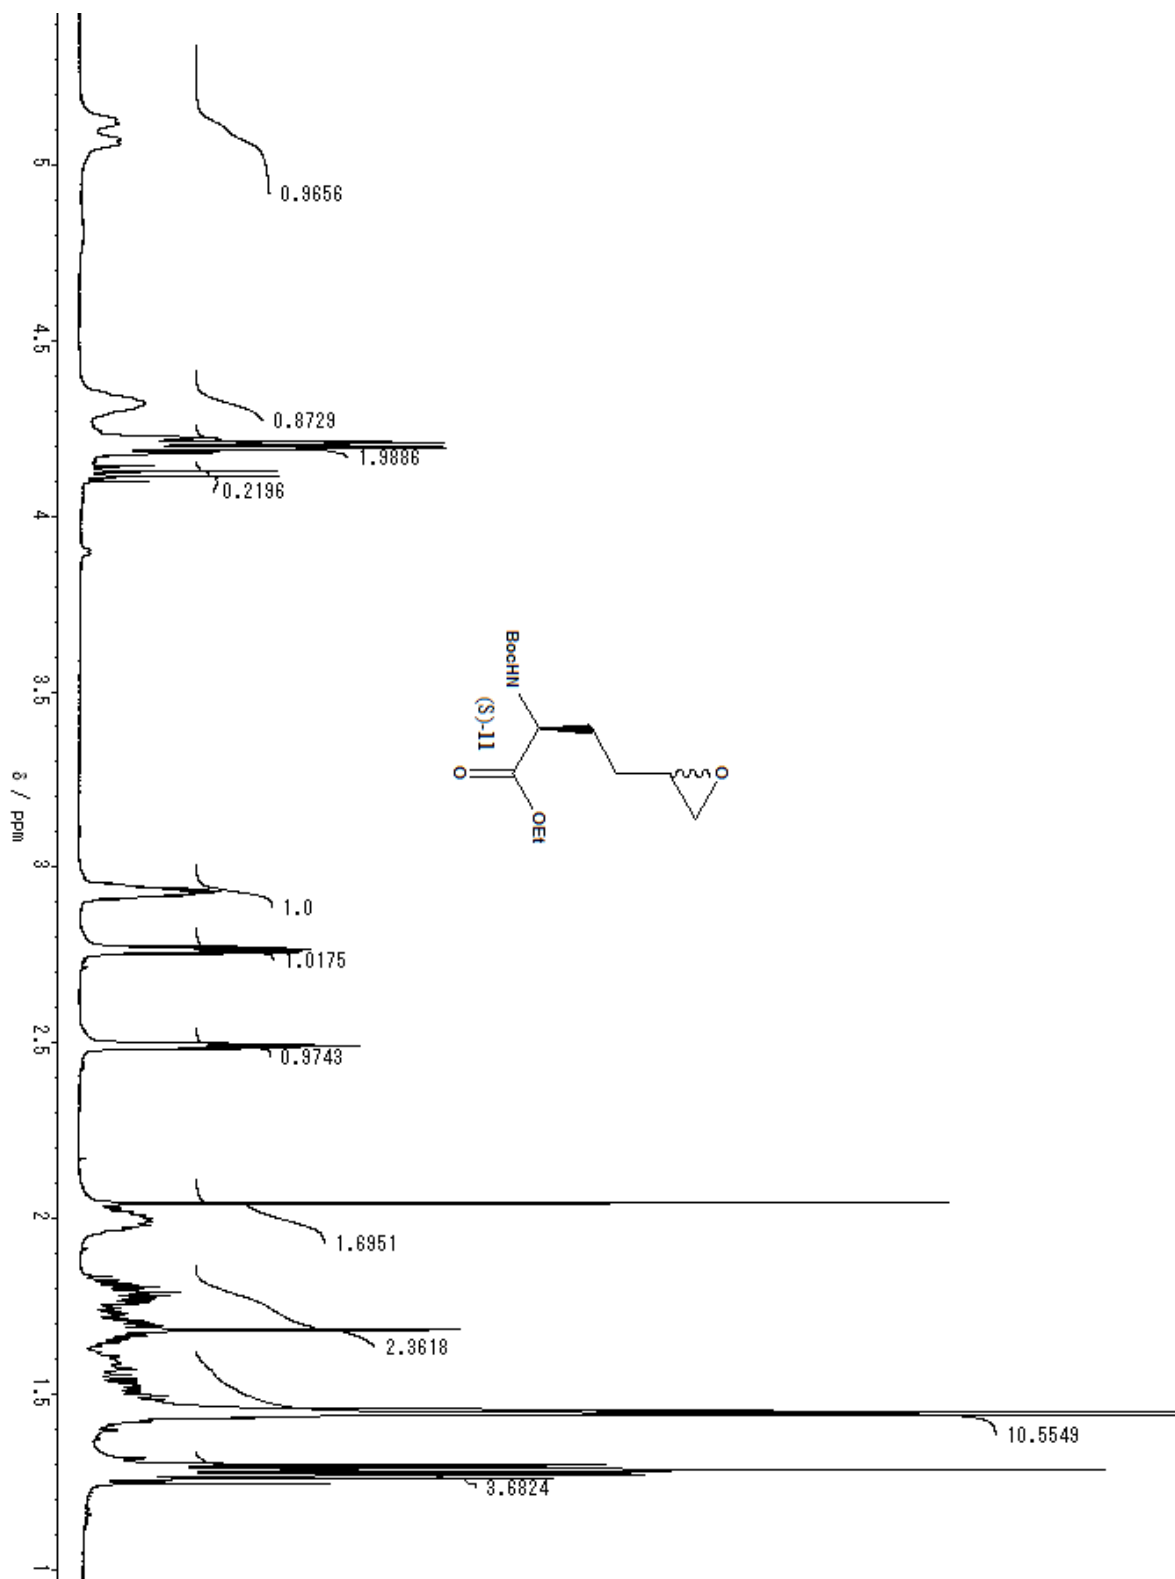

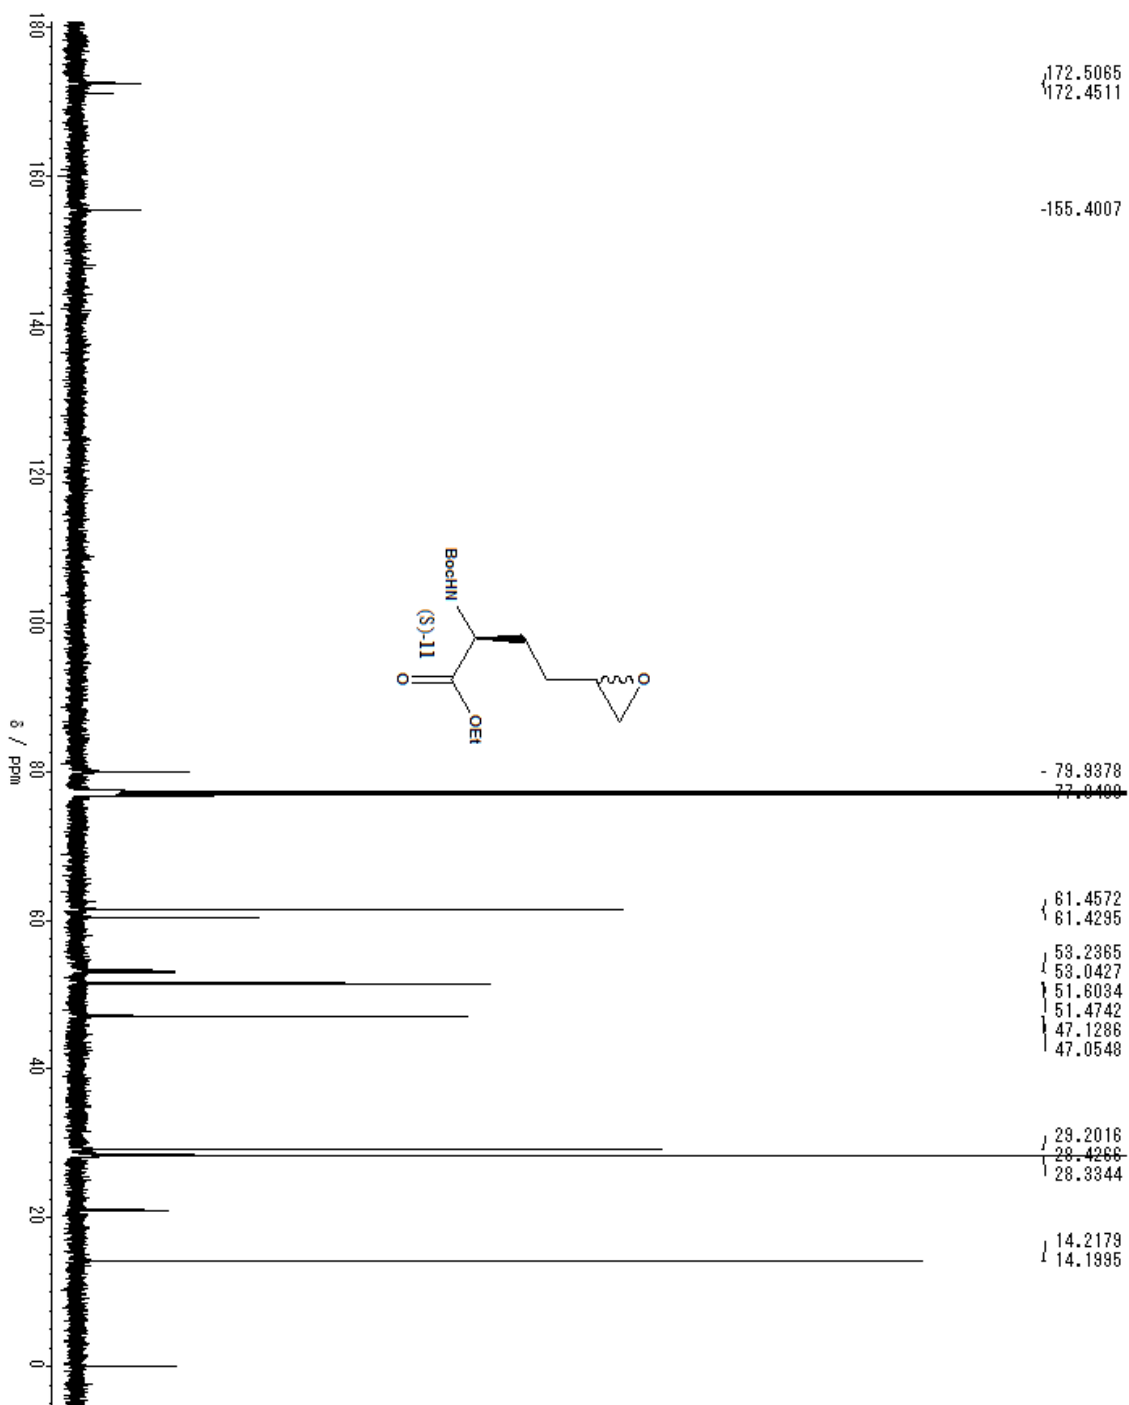

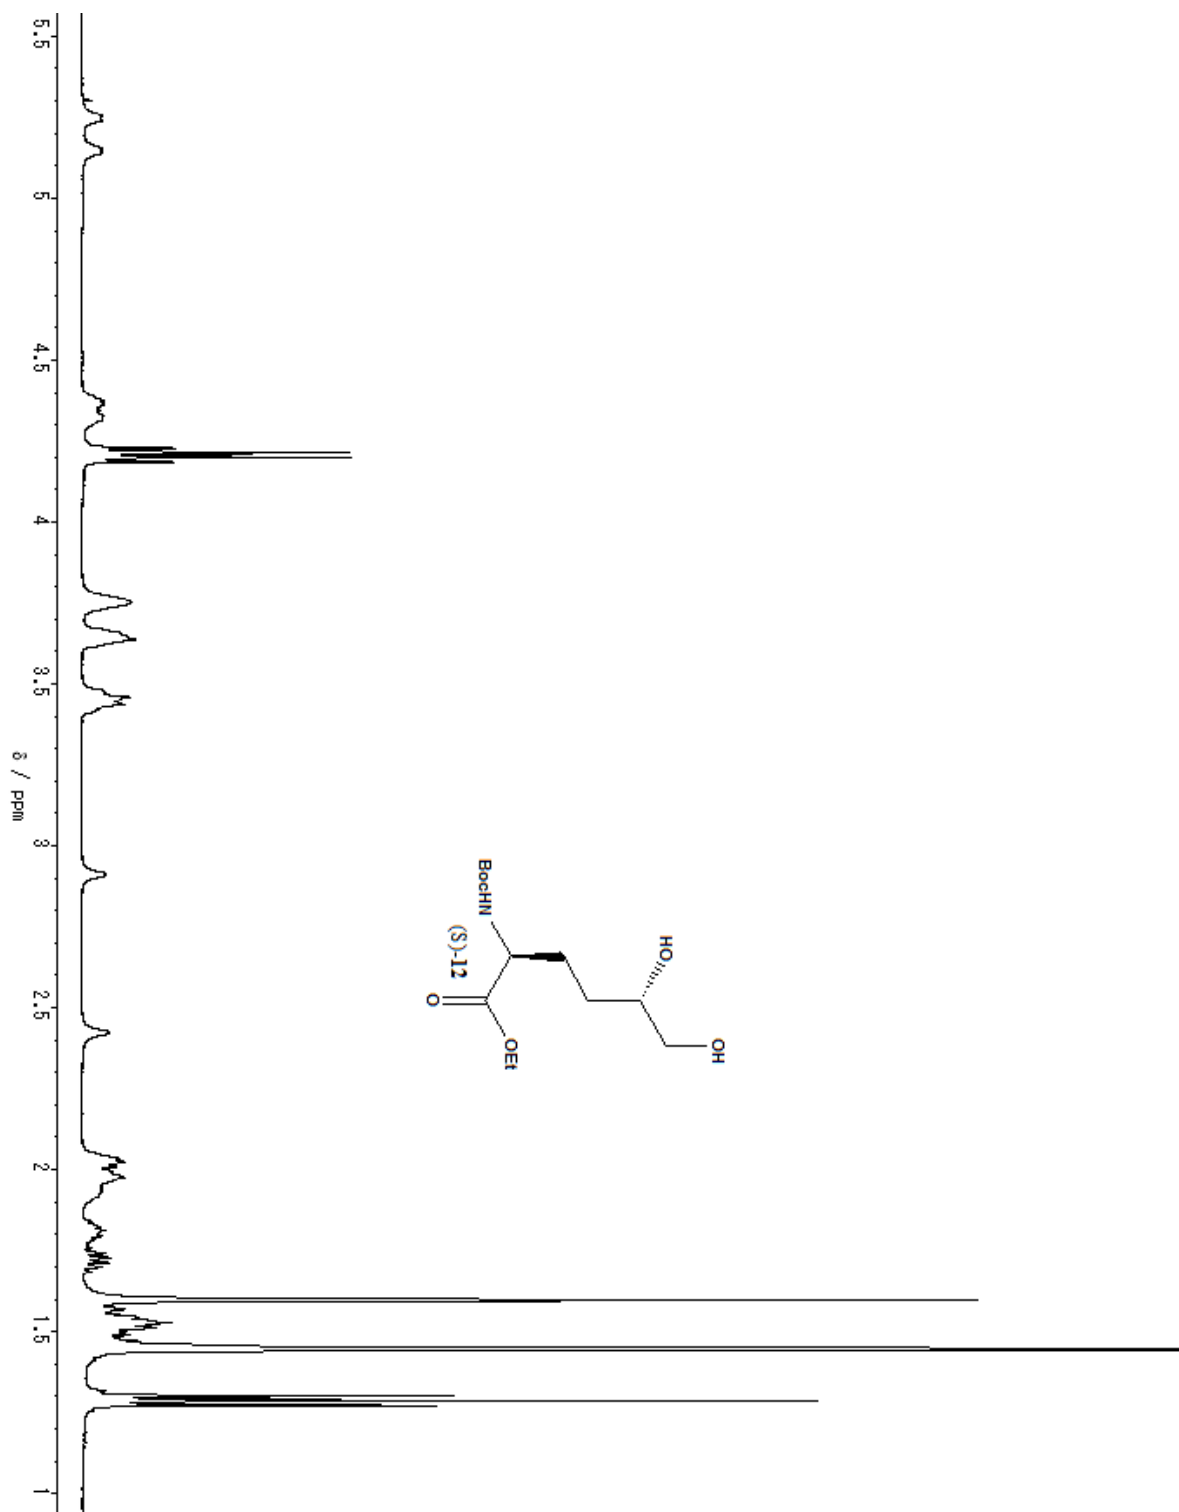

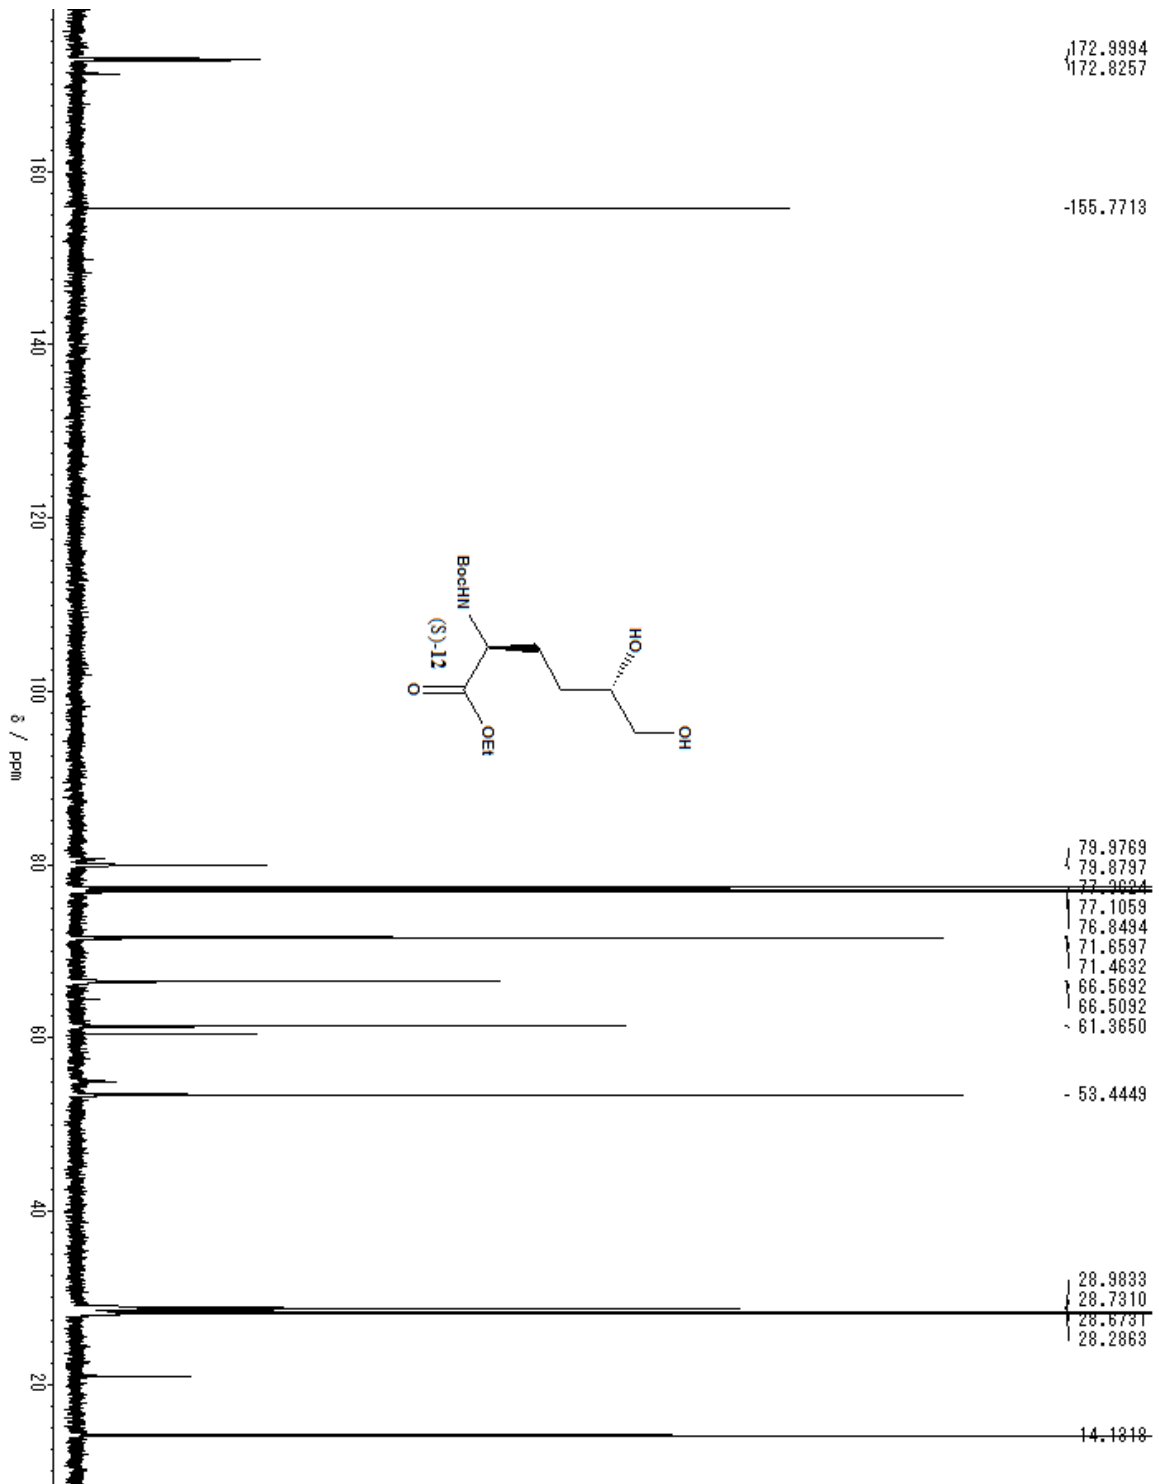

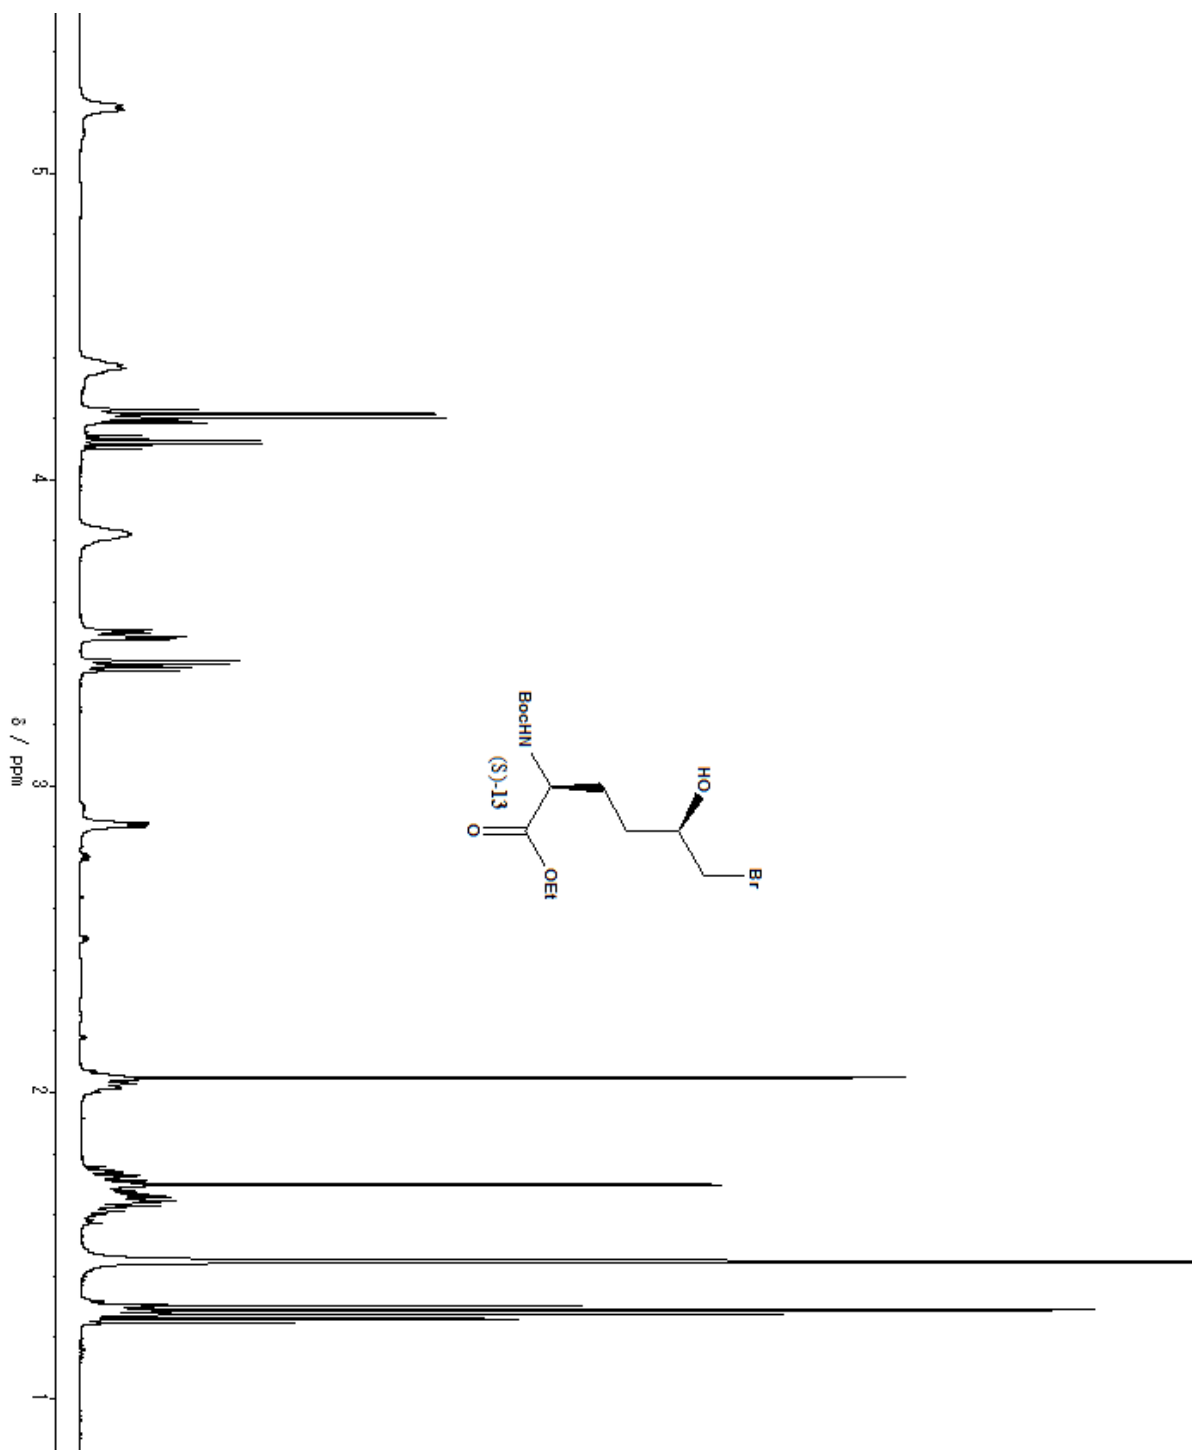

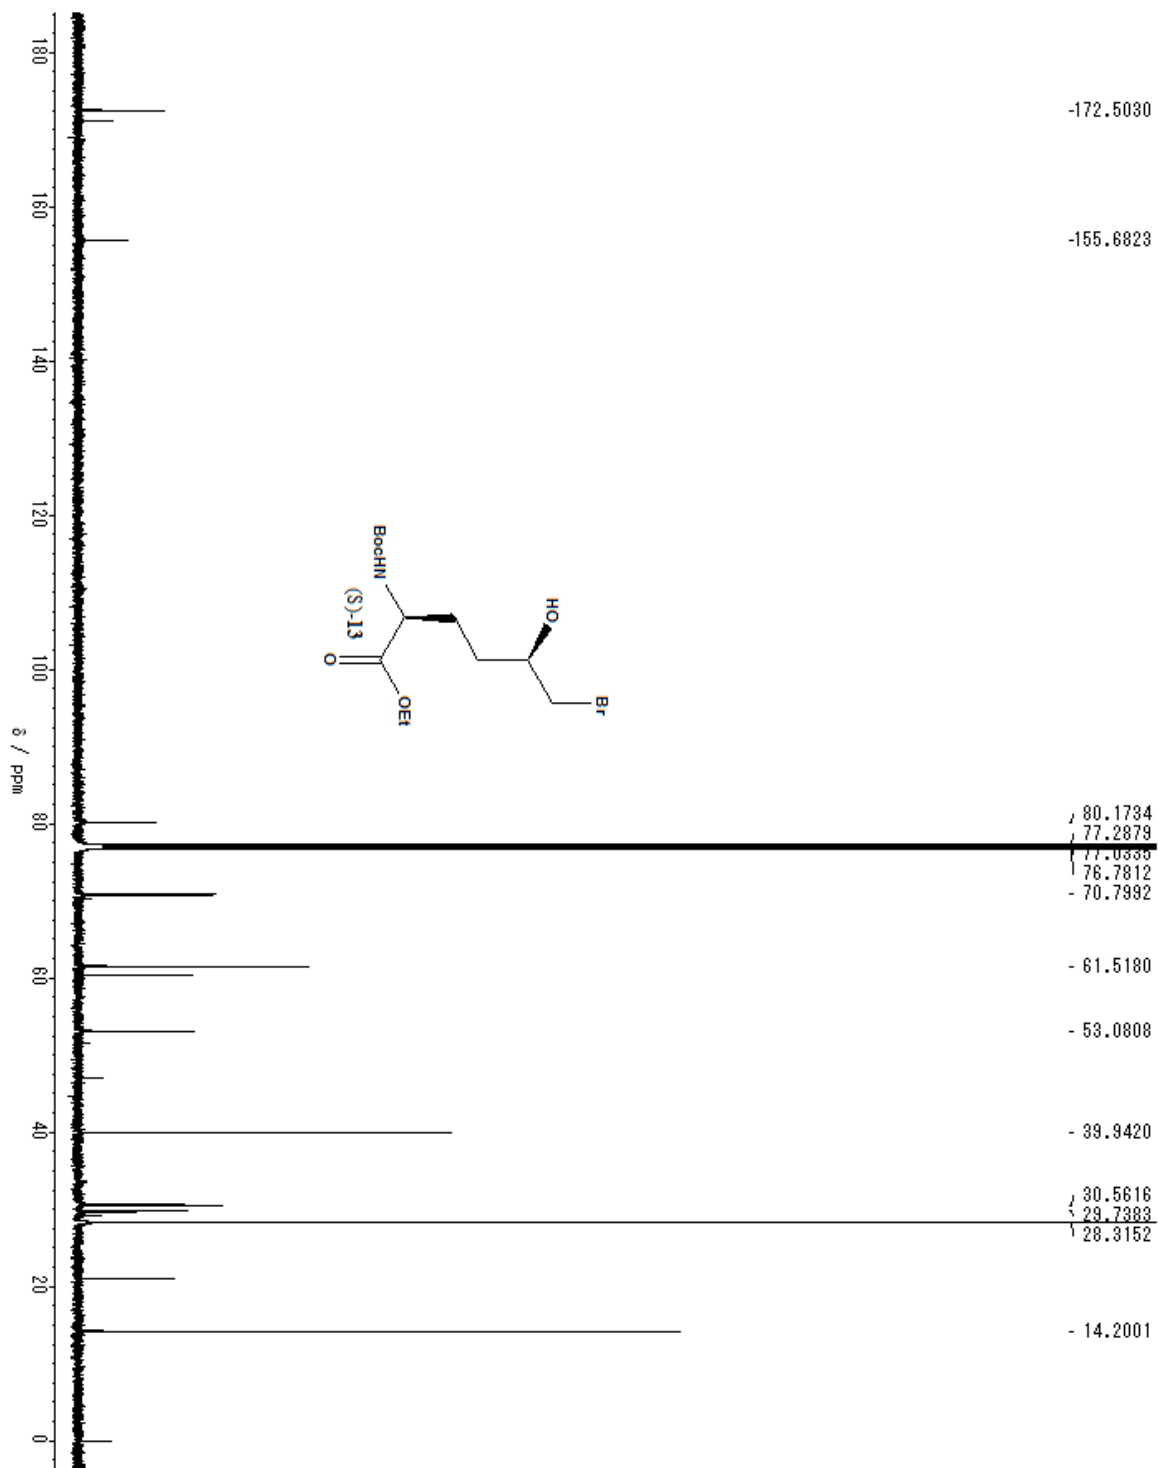



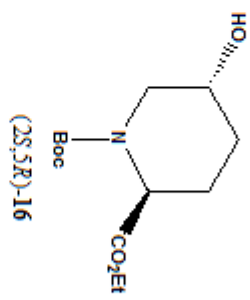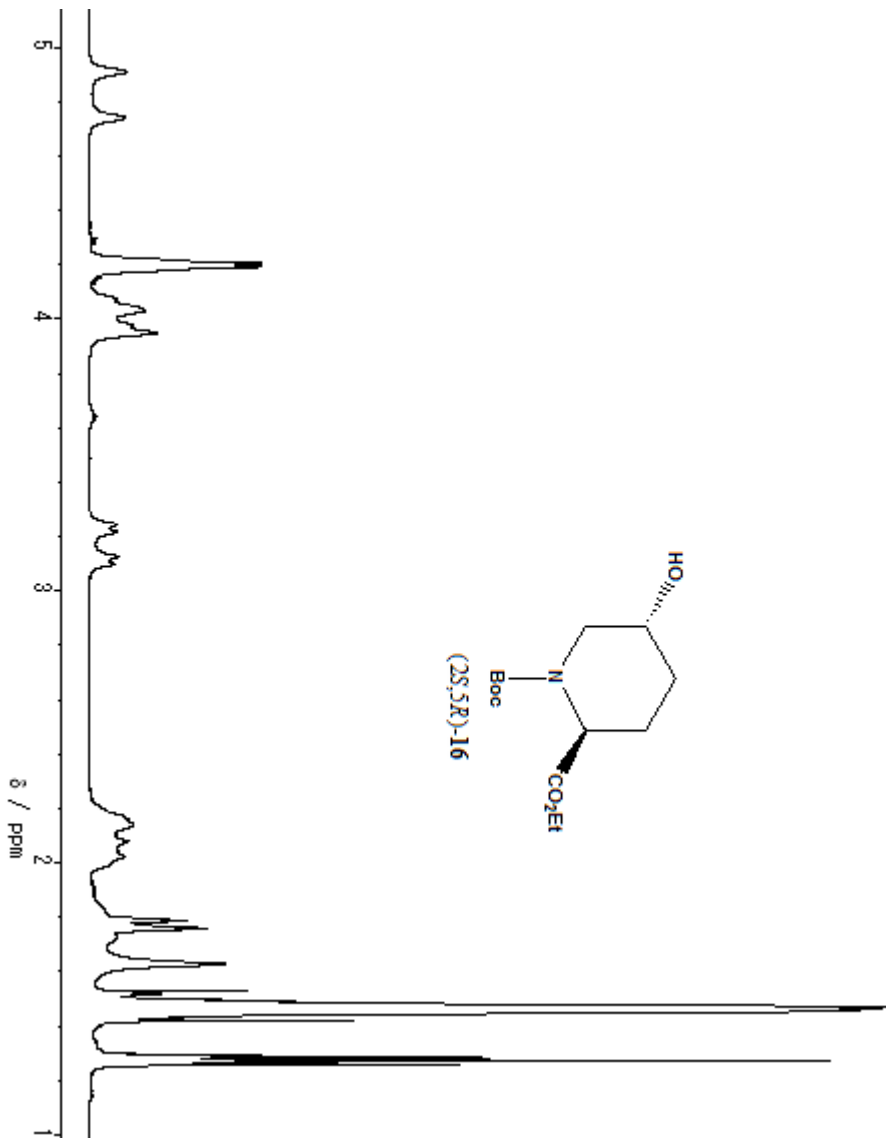

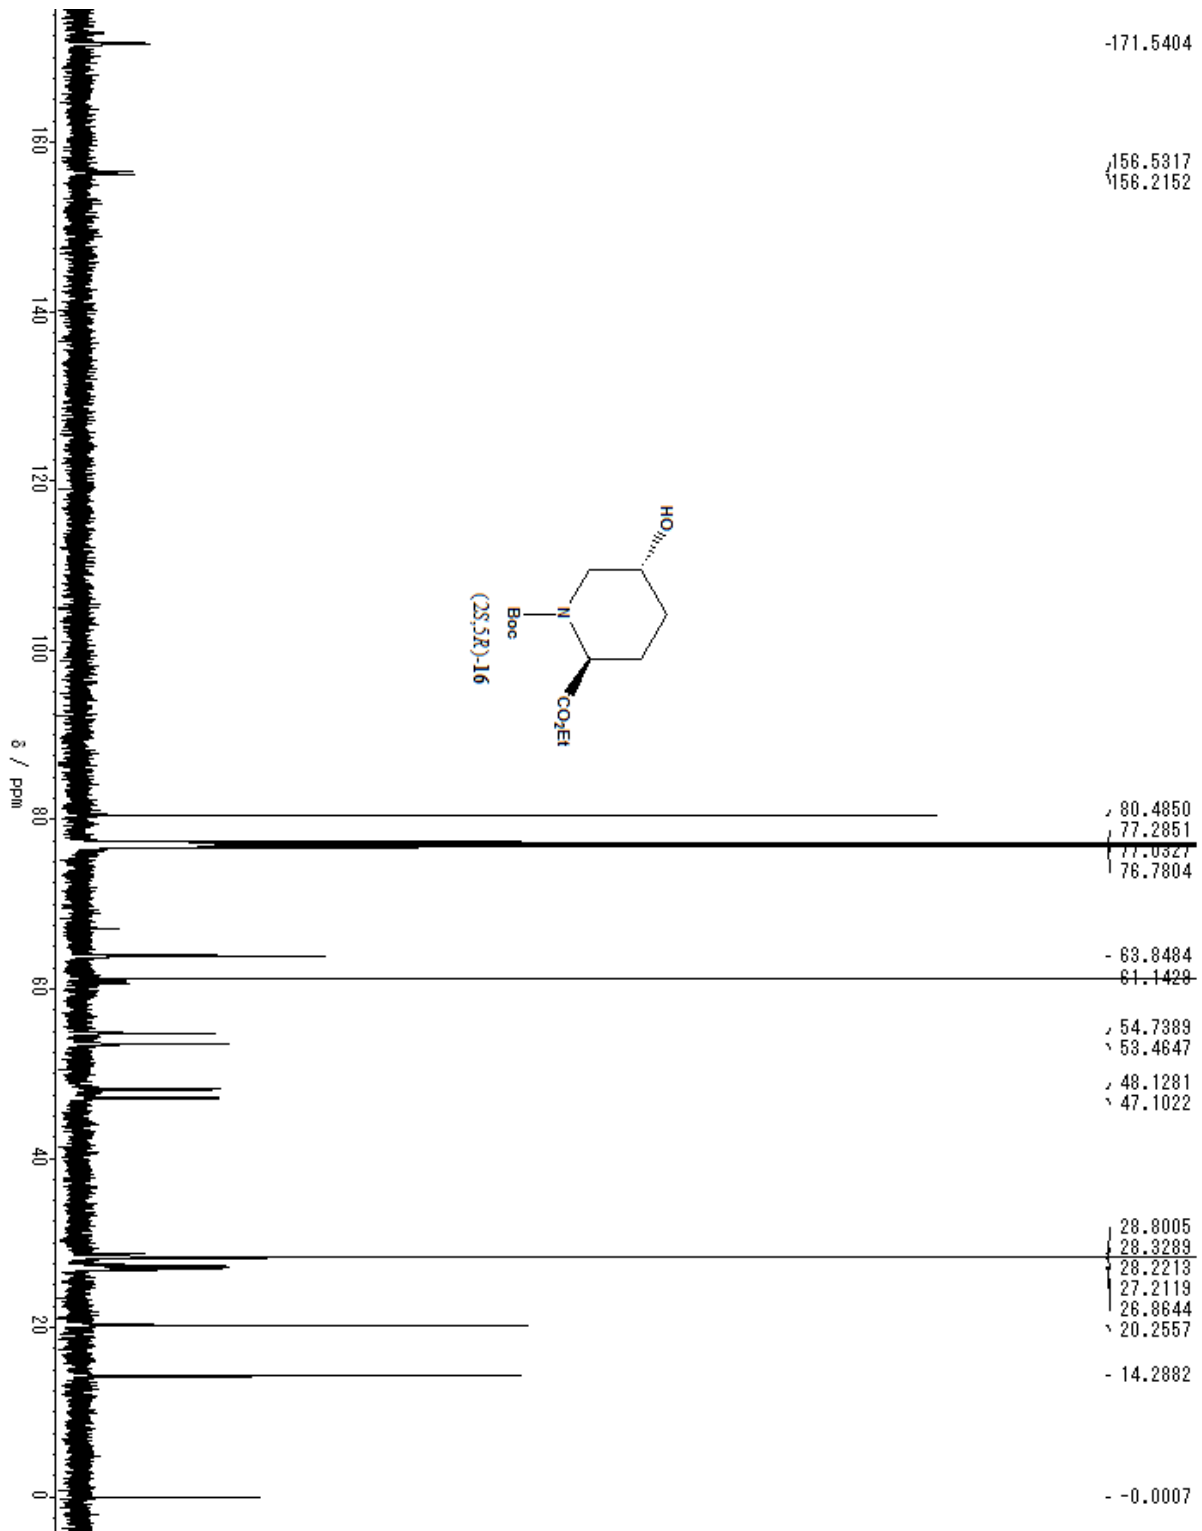

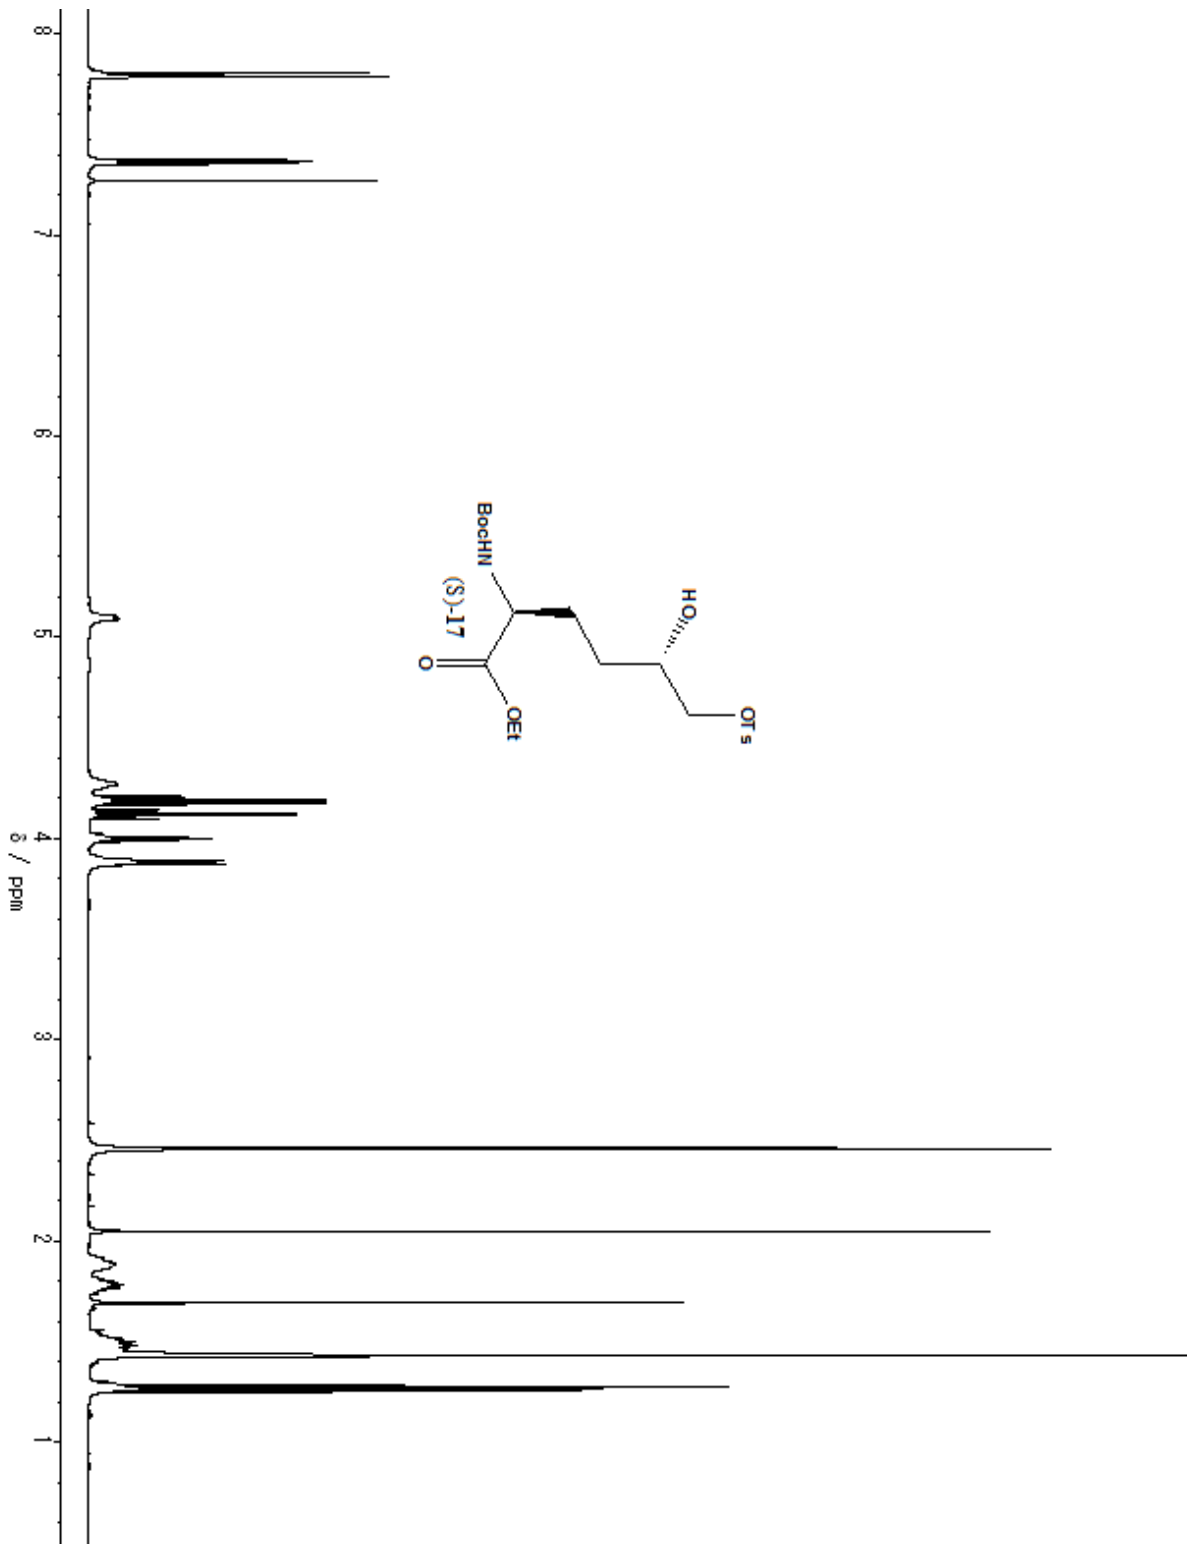

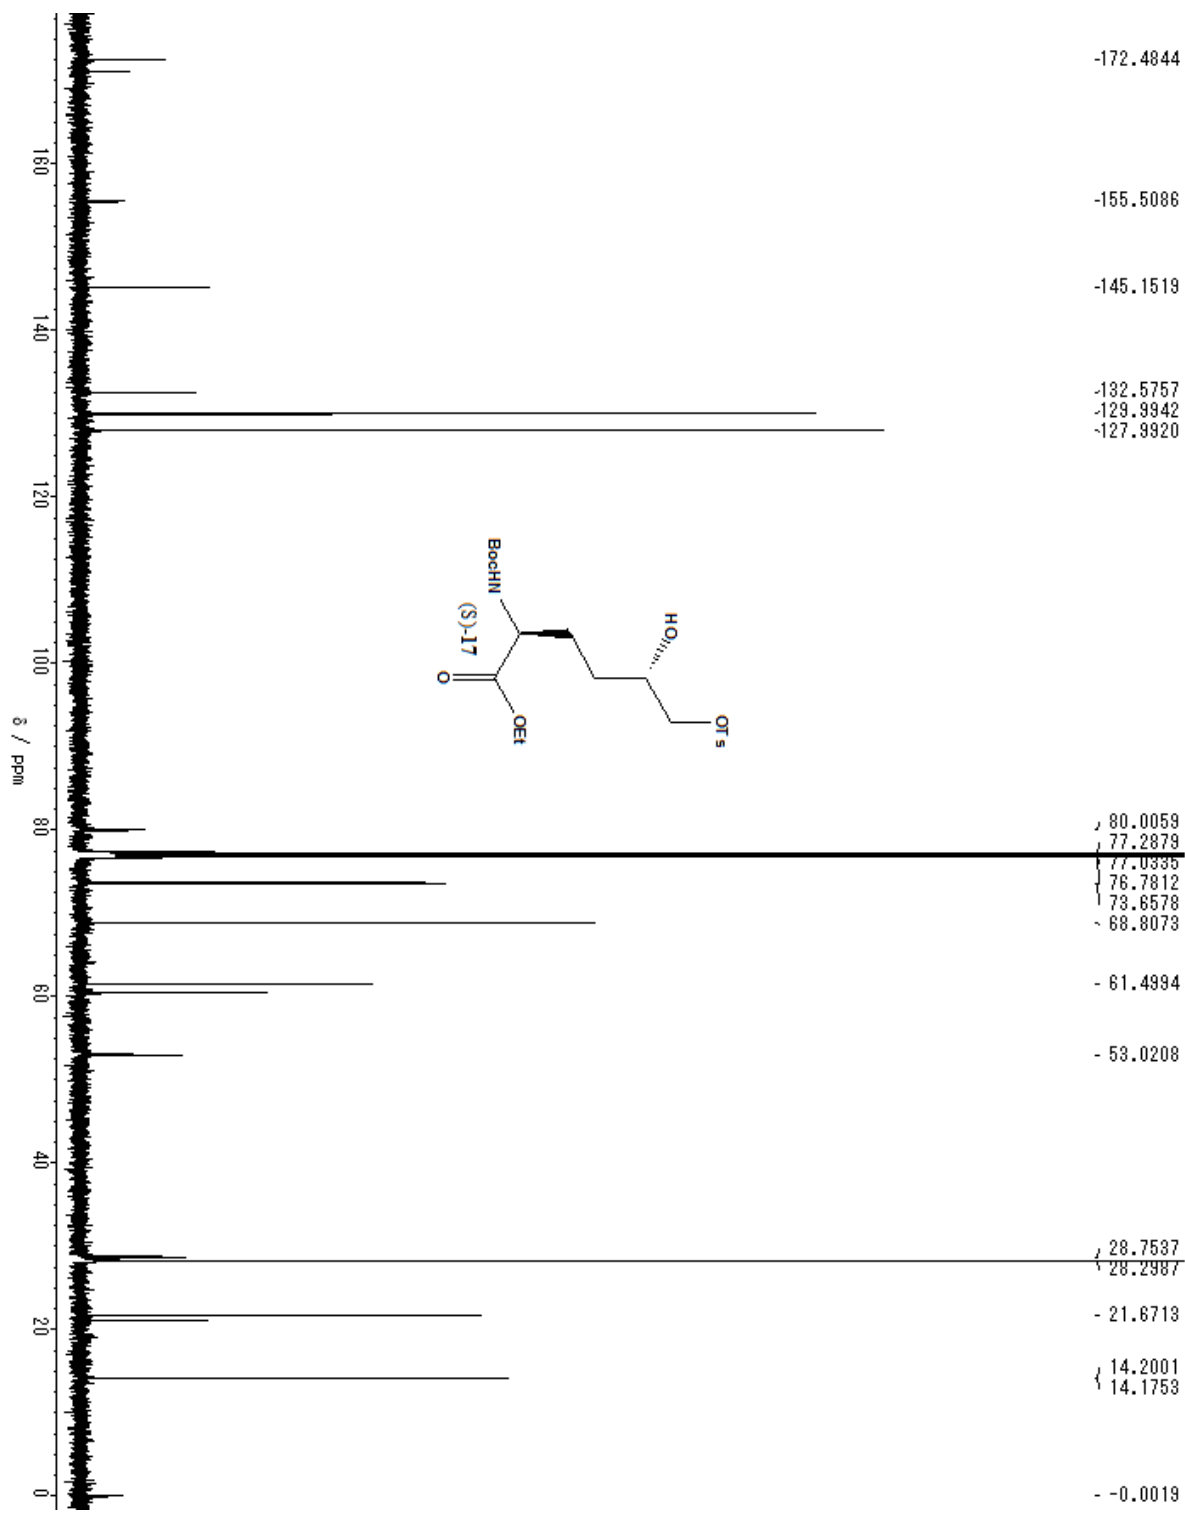

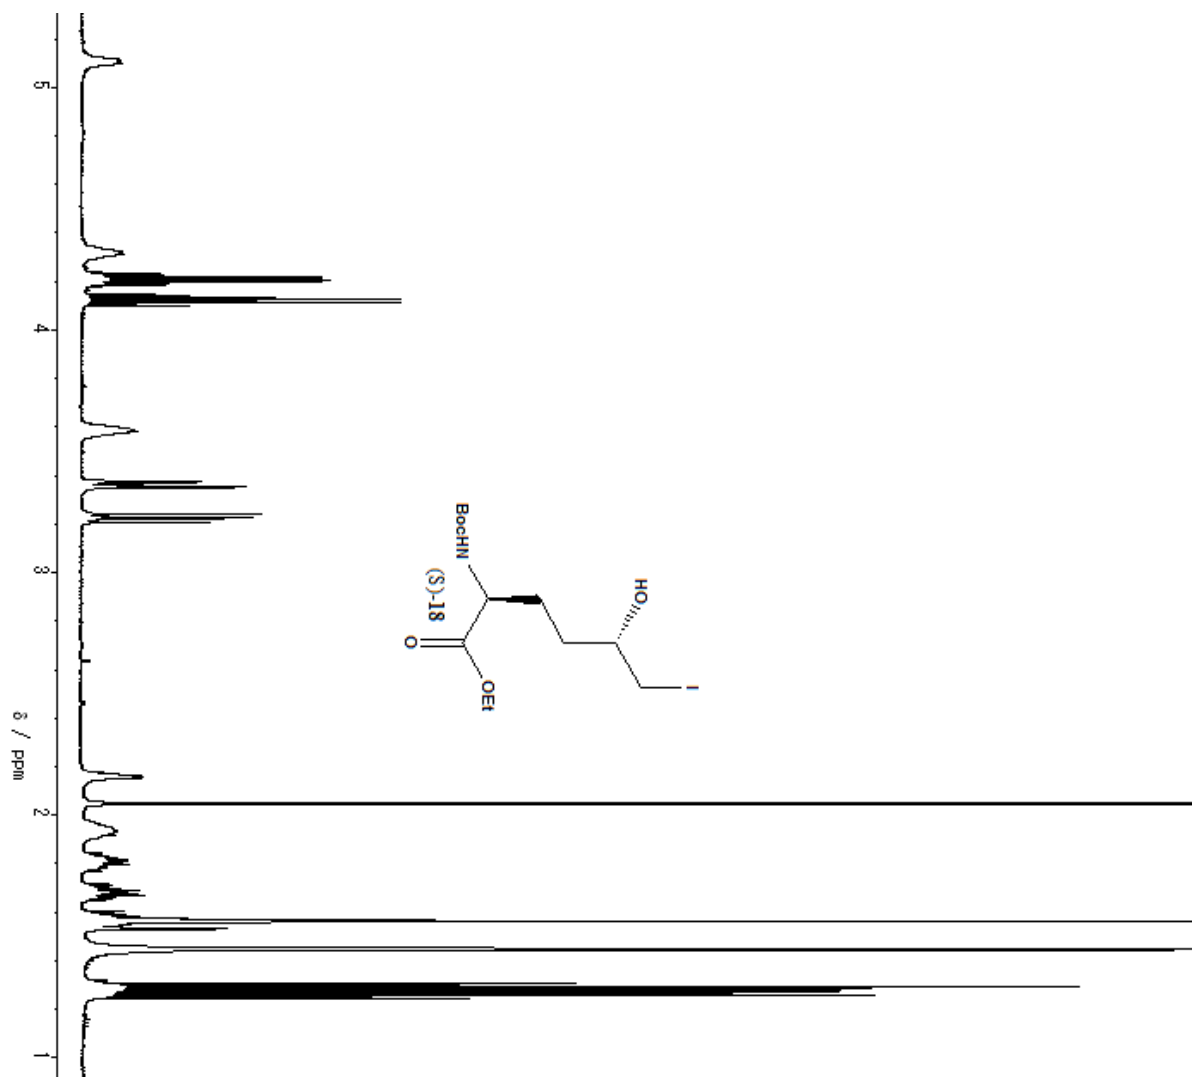

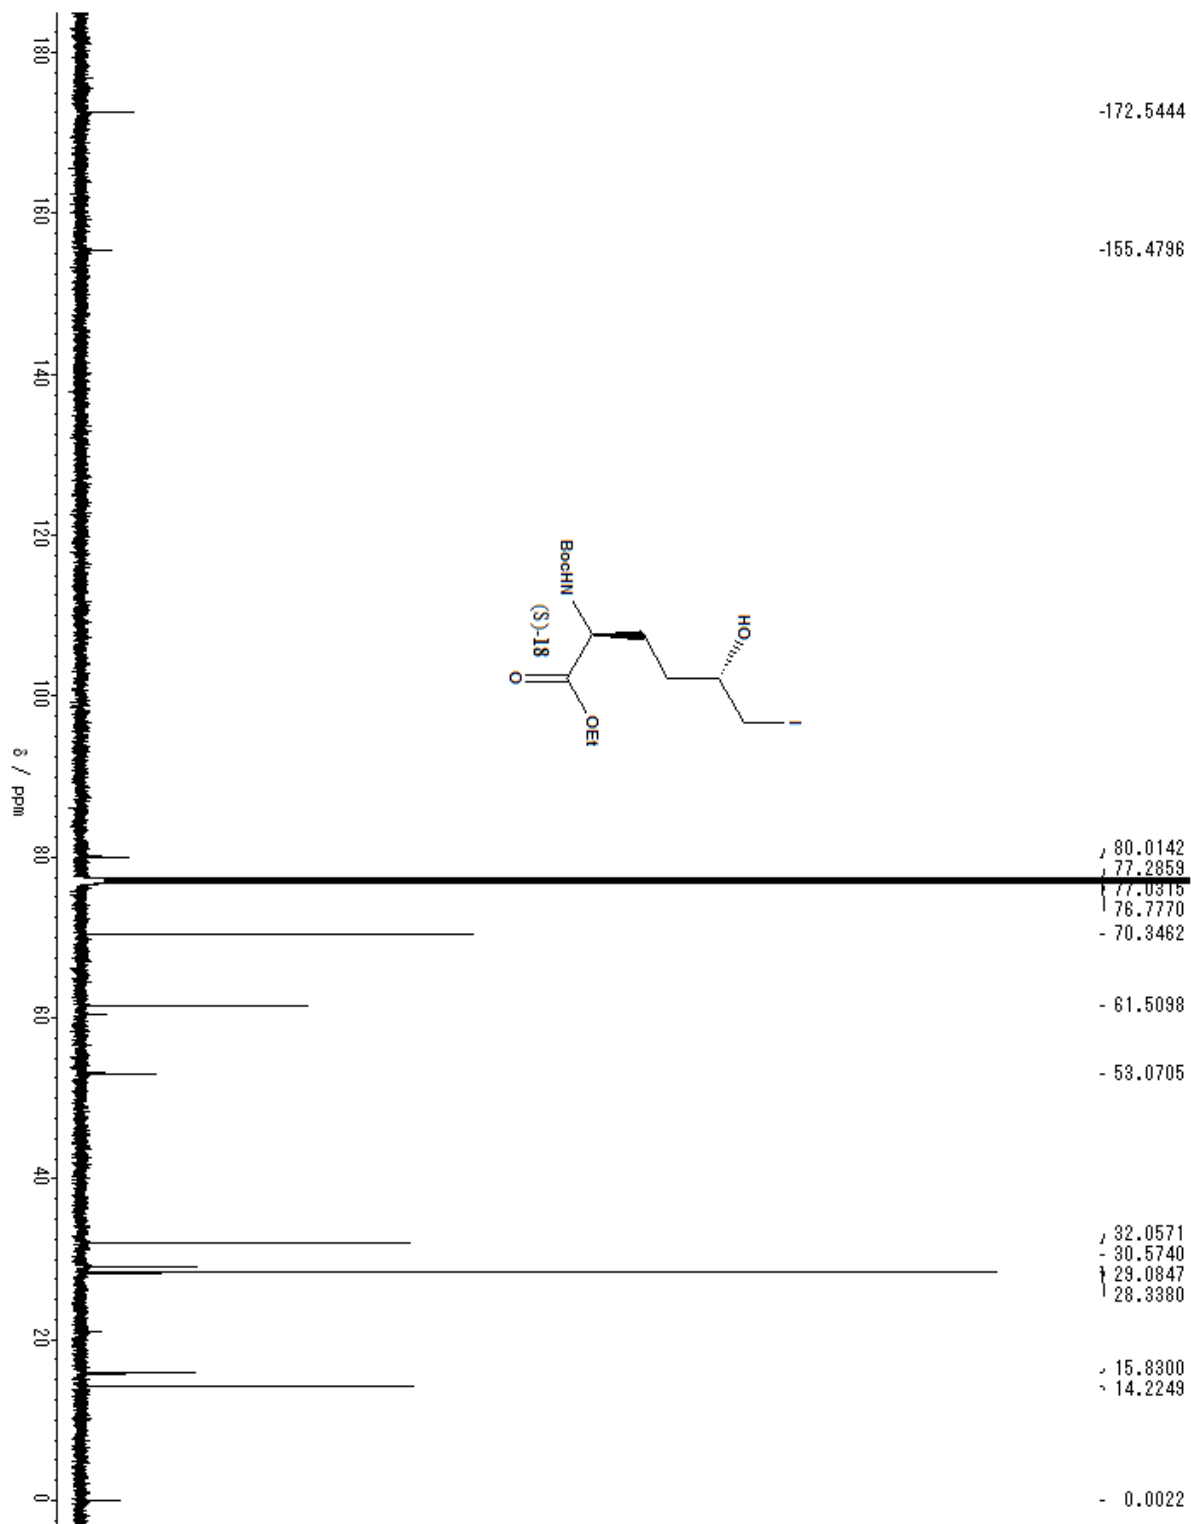

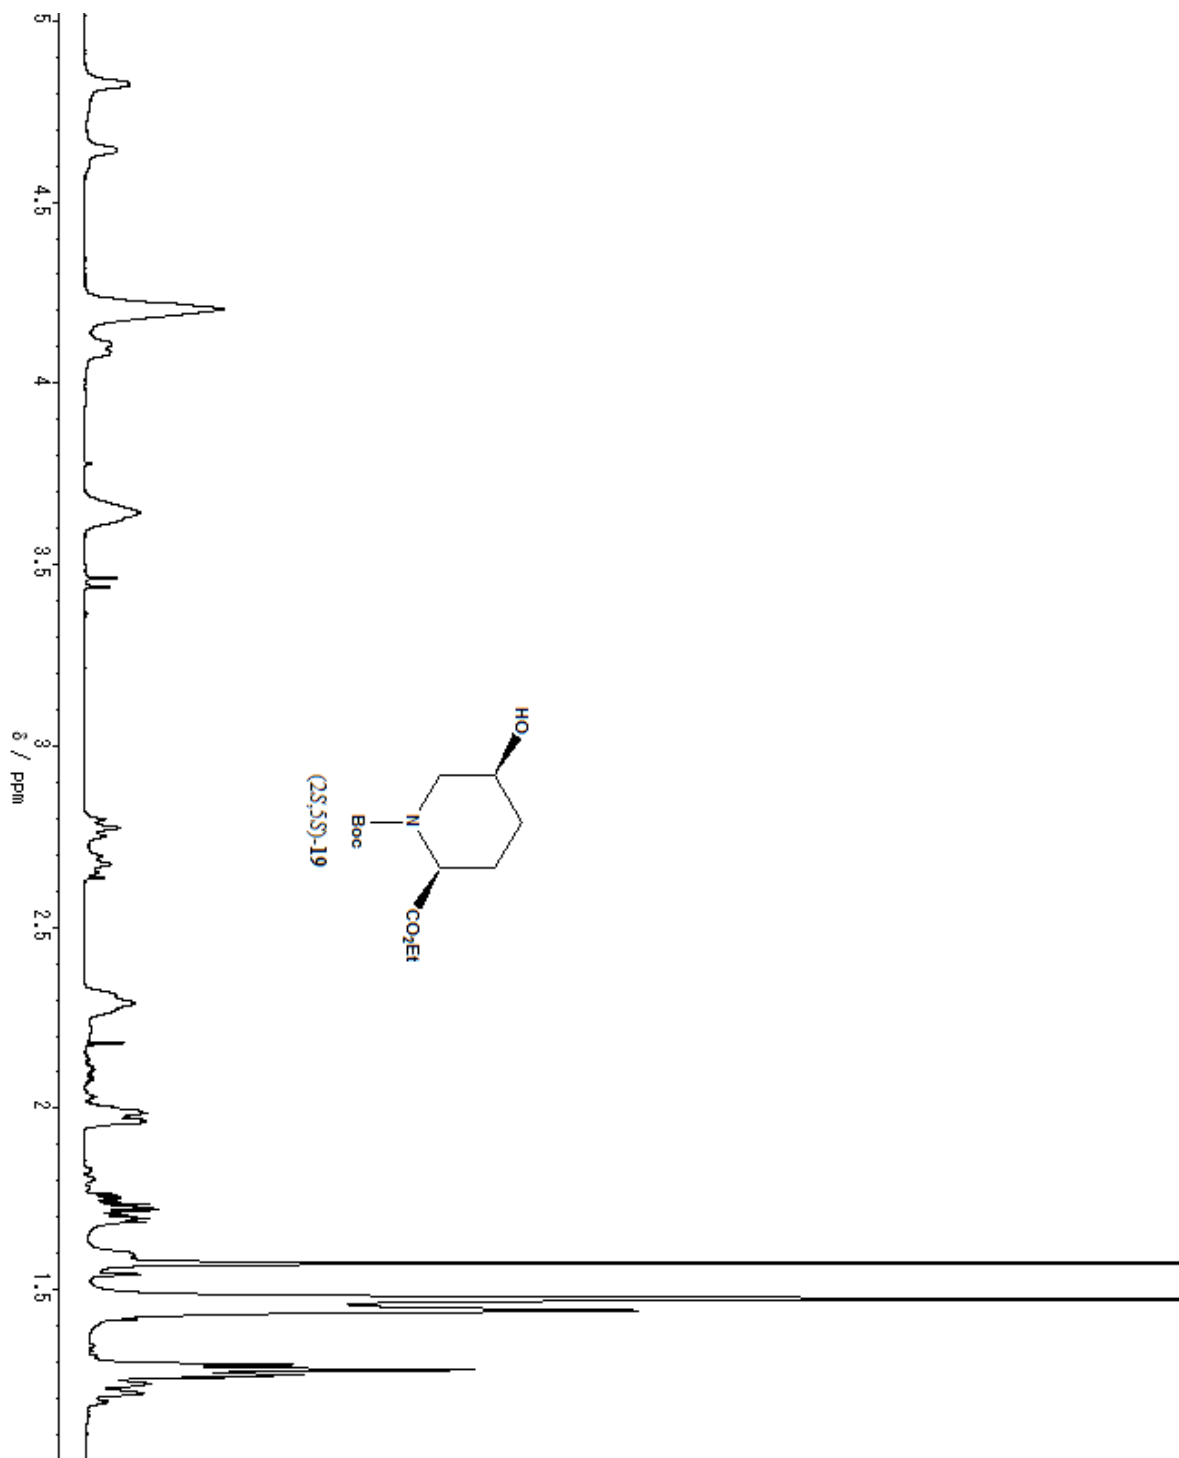

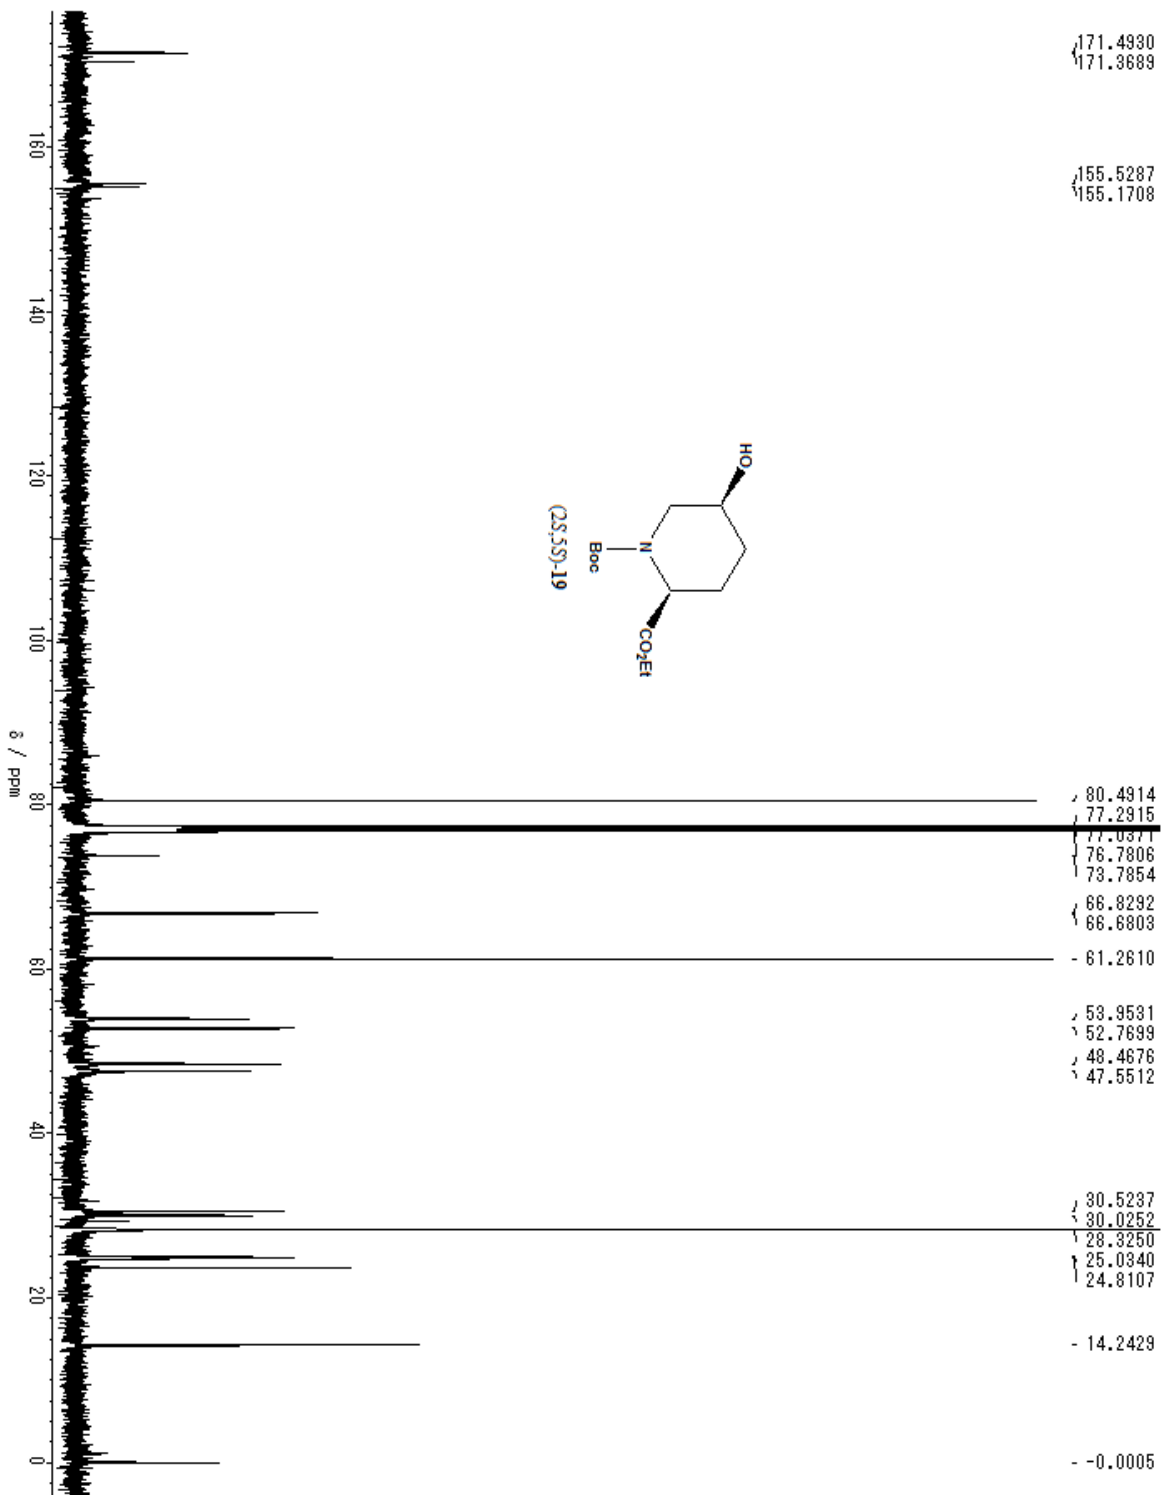



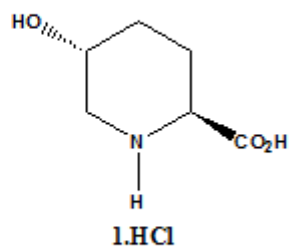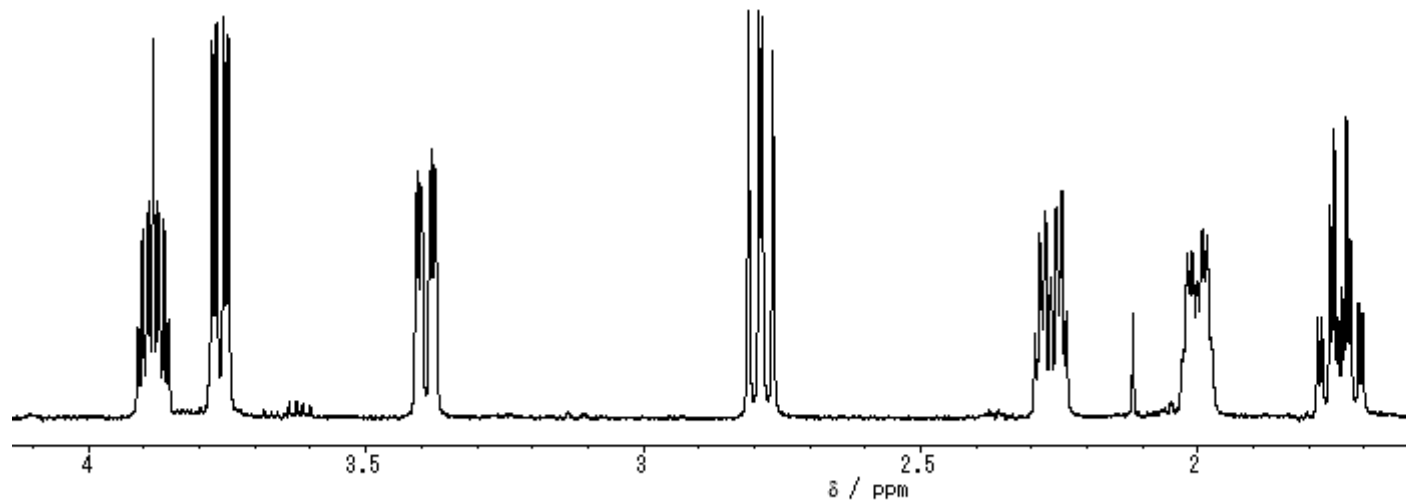

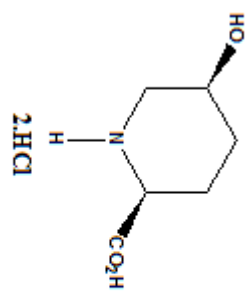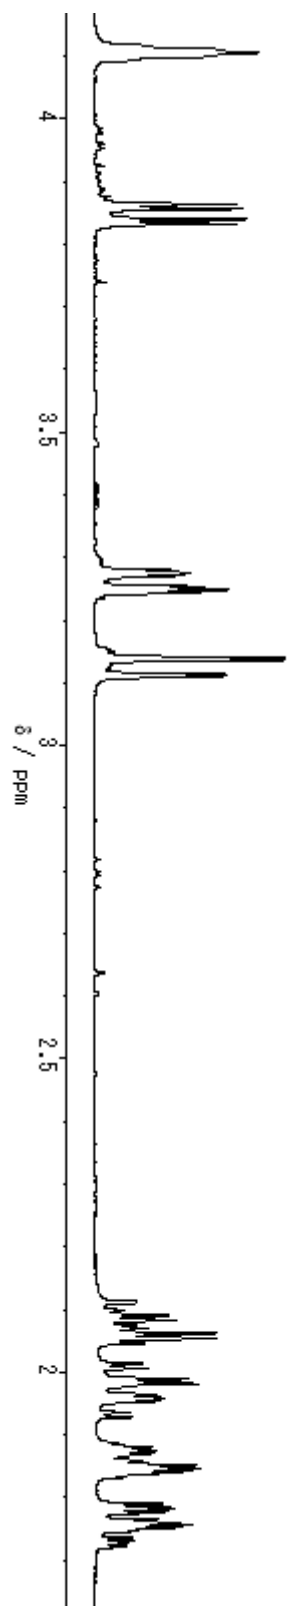

Supplement: c5ra09207h1.pdf [file c5ra09207h1.pdf]
